1 **Pollinator species traits do not predict either response to**  
2 **agricultural intensification or functional contribution**

3 Ignasi Bartomeus<sup>1,\*</sup>, Daniel P. Cariveau<sup>2,3</sup>, Tina Harrison<sup>2</sup>, Rachael Winfree<sup>2</sup>

4 <sup>1</sup> Estación Biológica de Doñana (EBD-CSIC), Sevilla, Spain.

5 <sup>2</sup> Rutgers University, The State University of New Jersey, New Brunswick, NJ  
6 08901, USA

7 <sup>3</sup> Department of Entomology, University of Minnesota, Saint Paul, MN 55113,  
8 USA

9 \* Correspondence author: [nacho.bartomeus@gmail.com](mailto:nacho.bartomeus@gmail.com)

10 **Running headline:** Pollinator traits are not predictive

11 **Summary:**

12 1. The response and effect trait framework, if supported empirically, would  
13 provide for powerful and general predictions about how biodiversity loss will  
14 lead to loss in ecosystem function.

15 2. This framework proposes that species traits will explain how different  
16 species respond to disturbance (i.e. response traits) as well as their  
17 contribution to ecosystem function (i.e. effect traits). However, predictive  
18 response and effect traits remain elusive for most systems.

19 3. Here, we present detailed data on crop pollination services provided by  
20 native, wild bees to explore the role of six commonly used species traits in  
21 determining how crop pollination is affected by increasing agricultural  
22 intensification. Analyses were conducted in parallel for three crop systems  
23 (watermelon, cranberry, and blueberry) located within the same geographical  
24 region (mid-Atlantic USA).

25 4. Bee species traits did not strongly predict species' response to any  
26 agricultural intensification process, and the few traits that were weakly  
27 predictive were not consistent across crops. Similarly, no trait predicted  
28 species' overall functional contribution in any of the three crop systems,  
29 although body size was a good predictor of per capita efficiency in two  
30 systems.

31 5. Pollinator traits may be useful for understanding ecological processes in  
32 some systems, but thus far we are unable to make generalizable predictions  
33 regarding species responses to land-use change and its effect on the delivery

34 of ecosystem services.

35 **Keywords:** Biodiversity, bees, ecosystem services, ecosystem function,  
36 response traits, effect traits, body size, diet specialism.

37

## 38 **Introduction**

39 Land-use change, along with other human-induced global change drivers, is  
40 accelerating the rates of extinction of most taxa (Ellis et al. 2010). At the same  
41 time, humanity relies on ecosystem services that wild species deliver, such as  
42 pollination and pest control by insects, and nutrient cycling by microorganisms  
43 (Cardinale *et al.* 2012). Thus, it is important to understand the relationship  
44 between biodiversity loss and ecosystem service delivery (Schwartz et al.  
45 2000). In particular, making generalizable predictions regarding how the  
46 decline or local extinction of taxa will affect ecosystem services will allow for  
47 targeted conservation actions to ameliorate negative impacts of land-use  
48 change.

49 One avenue for predicting the functional consequences of biodiversity loss is  
50 the response and effect trait framework (Lavorel & Garnier 2002, Naeem &  
51 Wright 2003, McGill et al. 2006). Local extinction does not occur at random  
52 because extinction risk is dependent on the species' characteristics.

53 Identifying which traits govern species responses to particular threats  
54 ('response traits') would provide the first step for predicting future species  
55 loss. Furthermore, the magnitude by which ecosystem function declines when

56 a species is lost depends on that species' functional contribution. This, too, is  
57 likely to be mediated by the species' traits ('effect traits'). Therefore, the  
58 relationship between response and effect traits will mediate the magnitude of  
59 the impact of human disturbance on ecosystem services (Schleuning, Fründ &  
60 García 2015). For example, if the same species traits that are associated with  
61 high function are also most sensitive to disturbance, ecosystem function  
62 would be predicted to decline rapidly (Larsen, Williams & Kremen 2005).

63 However, for the response-effect trait framework to be generalizable, it is first  
64 necessary to identify response and effect traits that are both explanatory and  
65 possible to measure in the field (Cadotte, Carscadden & Mirotnick 2011).  
66 While a few generalities have emerged as to which traits make animal species  
67 at greater risk of local decline, including dietary or habitat specialization and  
68 body size (Fisher & Owens 2004; Ockinger *et al.* 2010), the correlation  
69 between these response traits and extinction risk has been found to be weak,  
70 variable, or context-dependent (Devictor, Julliard & Jiguet 2008; Powney *et al.*  
71 2014; Fritz, Bininda-Emonds & Purviis 2009). Similarly, although some effect  
72 traits have been identified, they are often weakly predictive, and their identity  
73 varies by function and taxonomic group (Gagic *et al.* 2015). Lastly, within the  
74 functional trait field as a whole, most progress has been made in identifying  
75 functional traits for plants (Diaz *et al.* 2016), while little is known for animals  
76 (Didham *et al.* 2016).

77 Here, we seek to identify response and effect traits for wild bee species  
78 providing a key ecosystem service, crop pollination. The yield of most crop

79 plants increases with animal pollination (Klein *et al.* 2007). While managed  
80 honey bees are a leading crop pollinator, wild insects contribute more than  
81 half of pollinator visits to crop flowers across more than 40 crop systems  
82 worldwide (Rader *et al.* 2016). A major threat to pollinators is habitat  
83 destruction, primarily conversion to agriculture (Garibaldi *et al.* 2011), which is  
84 also a leading cause of species loss worldwide (Pereira *et al.* 2010). Thus  
85 agricultural land use has the potential to affect the ecosystem service upon  
86 which agriculture itself depends (Deguines *et al.* 2014).

87 Our data sets were collected and analyzed in parallel and come from three  
88 crop systems (watermelon, cranberry and blueberry) located within the same  
89 geographical region (mid-Atlantic USA), but pollinated by distinct bee  
90 communities. We determined whether six commonly-used species traits can  
91 predict 1) species' responses to agricultural intensification (response traits)  
92 and/or 2) species' contributions to crop pollination (effect traits).

### 93 **Material and methods:**

#### 94 *Study system*

95 We selected 49 sites across three study systems that were located throughout  
96 New Jersey and eastern Pennsylvania (USA). Watermelon sites (N = 17)  
97 were located in 90 x 60 km region central New Jersey and Eastern  
98 Pennsylvania, where the main types of land use are agriculture and suburban  
99 development, interspersed with highly fragmented deciduous forest.  
100 Cranberry and blueberry sites (N = 16 each) were both located within a 35 x

101 55 km area in southern New Jersey, where the main land cover types are  
102 pine-oak ericaceous heath and agriculture. All sites in all systems were  
103 separated by at least 1 km (range, watermelon: 2-90 km, cranberry: 1-32 km,  
104 blueberry 1-38 km).

105 All three of crops are highly dependent upon bee pollination for marketable  
106 fruit production (Klein *et al.* 2007). Commercial honey bees are used in most  
107 of our study fields. However, honey bees are primarily managed hives, moved  
108 throughout the region, and only found on sites during bloom. Therefore, honey  
109 bees are not influenced by land cover in the same manner as wild bees and  
110 are not used in our analyses. Wild bees are important pollinators in all three  
111 systems (mean percentage of wild bee visits: 73% watermelon, 25%  
112 cranberry, and 14% blueberry).

113 *Data collection:*

114 At all sites on all three crops, we used hand-netting to measure overall bee  
115 abundance and species richness. To collect bees, we walked along fixed  
116 transects at standard times of day and collected all bees observed to be  
117 visiting flowers. In watermelon and blueberry, bees were netted three times  
118 throughout the day for 20 minutes per transect (60 minutes per date per site)  
119 and twice each day in cranberry for 30 minutes per transect (120 minutes per  
120 date per site). Data were collected during the peak bloom in 2010  
121 (watermelon: July, cranberry: late-May-early July, blueberry: April-early May).  
122 Data were collected on three days per site for watermelon and blueberry and  
123 two days per site for cranberry. Detailed methods can be found in Benjamin

124 Reilly & Winfree (2014), Winfree *et al.* (2015), Cariveau *et al.* (2013).

125 *Land cover characteristics of sites*

126 To relate pollinator response traits to land use, we required high-quality land  
127 cover data for each pollinator collection site. For the cranberry and blueberry  
128 sites in New Jersey, we used a continuous polygon layer classified by visual  
129 photograph interpretation into 60 categories, at a minimum mapping unit of  
130 4047 m<sup>2</sup> (1 acre; GIS Data provided by the New Jersey Department of  
131 Environmental Protection). For watermelon sites that extend from central New  
132 Jersey into Pennsylvania, we created a similar land cover data layer by  
133 manually digitizing Google Earth imagery and visually classifying 15  
134 categories, at a minimum mapping unit of 5,000 m<sup>2</sup> (1.24 acres). As each crop  
135 was analyzed separately, our results are robust to using different land cover  
136 data. However, to simplify the interpretation of results for the three crops, we  
137 reclassified all land cover data into the following 7 broad categories:  
138 agriculture, open managed (for example, mowed grass), open natural or semi-  
139 natural (for example, old fields), semi-urban (<30% impervious surface), urban  
140 (>30% impervious surface), wooded, and open water.

141 Prior to doing our spatial analyses, we explored several different landscape  
142 characteristics, because agricultural land-use change can occur at multiple  
143 scales and affect multiple landscape attributes. For each data collection site  
144 we calculated four land cover variables: a) percent agriculture, b) percent  
145 natural and semi-natural open habitat, c) forest edge length, and d) habitat  
146 heterogeneity. We used agricultural land cover as our primary land use

147 change variable, as it is the dominant anthropogenic habitat type in all three  
148 study systems. Percent open natural/semi-natural habitat makes up a small  
149 proportion of the total land cover (mean 6.8% cover at 1500 m radius) but is  
150 likely to be disproportionately important as forage and nesting habitat for bees  
151 (Kleijn *et al.* 2006). Forest edge length may represent important habitat for  
152 bees that nest in woods but forage in open areas (Kells & Goulson 2003).  
153 Diverse patchy landscapes may be beneficial to bees as they may nest and  
154 forage in different habitats (Kremen *et al.* 2007); thus we include Shannon H  
155 diversity of the seven cover categories as a measure of habitat heterogeneity.  
156 We calculated values for all four land cover variables at both a small scale  
157 (300 m radius) and a large scale (1500 m radius), which correspond to typical  
158 flight distances of small- and large-bodied bees, respectively (Greenleaf *et al.*  
159 2007).

#### 160 *Pollinator function*

161 To estimate the pollination services provided per bee species, we measured  
162 two variables in the field, flower visitation frequency and per visit efficiency. As  
163 variation in visitation frequency may be a function of land use at individual  
164 farms, we use species abundances for each species at the site with its highest  
165 abundance for each crop. Hence, we assess visitation frequency at its  
166 maximum, which represents the optimal visitation frequency for each species.

167 To measure the pollination efficiency we quantified single-visit pollen  
168 deposition by presenting virgin flowers to individual bees foraging on the  
169 target crop. After visitation, we counted the number of pollen grains deposited



170 per flower visit (watermelon) or the number of pollen tetrads with pollen tubes  
171 per flower visit (cranberry and blueberry). Because species identification in the  
172 field is not possible for most bees and net collecting immediately after visits is  
173 generally not possible, for the measurement of pollination efficiency we  
174 grouped bees in species groups. Each group consisted of between one and  
175 27 species, with the median number of species per group being 4 species  
176 (Supporting Information, Table S1). Control flowers were left bagged until the  
177 end of the field day, and contained few pollen grains (watermelon mean = 3  
178 grains, N = 40 stigmas; cranberry mean = 0 tetrads, N = 82 stigmas; blueberry  
179 mean = 2 tetrads, N= 734 stigmas). For detailed methods see Benjamin *et al.*  
180 (2014), Winfree *et al.* (2015), Cariveau *et al.* (2013).

#### 181 *Species traits*

182 Bee species vary in a number of traits that are associated with their response  
183 to land-use change (Williams *et al.* 2010). Moreover, these traits will likely  
184 affect the pollinator contribution to function, either by modifying its abundance  
185 or because they are related to its per capita effectiveness. We obtained  
186 detailed natural history data on 6 traits for the 90 bee species in our study: a)  
187 sociality (solitary, facultative social, eusocial), b) nesting placement (hole,  
188 cavity, stem, wood, ground), c) brood parasite (yes, no), d) body size, e) diet  
189 breadth (level of specialization) and f) tongue length.

190 We obtained the trait data as follows. Species sociality level, nesting behavior  
191 and brood parasite status were extracted from the literature (Bartomeus *et al.*  
192 2013a). Body size (estimated from intertegular span, IT; Cane 1987) was

193 measured in the lab using collected specimens that had been identified to the  
194 species level by professional taxonomists. Multiple specimens were measured  
195 per species (mean = 6.6 specimens  $\pm$  3 S.E.) and the mean across the  
196 measured specimens was used as the value for the species. Bee body size  
197 also correlates strongly with foraging distance (Greenleaf *et al.* 2007), and  
198 thus is ecologically related to mobility. Tongue length was measured in the lab  
199 for  $7.7 \pm 1.2$  SE specimens per species, and the mean across the measured  
200 specimens is used. For the 40 specimens for which we cannot obtain a  
201 tongue measure, we estimated tongue length from the species' body size and  
202 phylogeny using an allometric equation (Cariveau *et al.* 2016).

203 Diet breadth was calculated using six independent datasets previously  
204 collected at 139 sites throughout the study region by the Winfree laboratory  
205 group. Each data set consists of individual pollinator specimens that were net-  
206 collected while foraging on a flowering plant species; both pollinator and plant  
207 were then identified to the species level. Those datasets comprise overall 393  
208 pollinator species, and 392 plant species, with 3890 plant-pollinator  
209 interactions (Supporting Information. Text S2). Prior to calculating diet  
210 breadth, we rarefied the data to 20 visitation records per bee species, to avoid  
211 confounding rarity with specialization (Blüthgen *et al.* 2008; Winfree *et al.*  
212 2014). Nine species had fewer than 20 records and we were unable to  
213 estimate diet breadth in the manner described above. Five of these species  
214 are known to be specialized and we simulated the diet breadth index of 20  
215 individuals visiting the known host plants. The four other species are known to  
216 be generalists and we therefore used the mean diet breadth of its genus.

217 These four species were extremely rare (< 5 records each) in our analyzed  
218 dataset.

219 To calculate diet breadth for each bee species, we considered the number of  
220 plants species as well as the phylogenetic breadth that the bees fed upon by  
221 using a rarefied phylogenetic diversity index(Nipperess & Matsen 2013). To  
222 determine phylogenetic distances among plants, we first constructed a  
223 general phylogenetic tree using the PHYLOMATIC “megatree” (version  
224 R201120829, Chamberlain & Szocs 2013) which defines relationships  
225 between higher plants (Webb, Ackerly & Kembel 2008). We then dated nodes  
226 across this tree according to Wikström et al. (2001) and used the branch-  
227 length adjustment algorithm BLADJ to estimate the age of all remaining,  
228 undated nodes. Though this procedure implies that ages within our  
229 phylogenies should be treated as approximations (Beaulieu *et al.* 2007),  
230 previous analysis indicates marked improvements of phylogenetic analyses  
231 when even a limited number of nodes are properly dated (Webb 2000).

### 232 *Statistical analysis*

233 **Response traits:** In order to investigate which traits are associated with  
234 environmental variables related to agricultural intensification, we used fourth-  
235 corner analysis (Legendre Galzin & Harmelin-Vivien 1997). This analysis is  
236 specifically designed to directly analyze the relationship between the  
237 biological characteristics of species and the characteristics of the habitat  
238 where they are found.

239 The fourth-corner approach links an R matrix of environmental variables to a

240 Q matrix of species traits through an L matrix of species abundance (Dray &  
241 Legendre 2008). A correlation coefficient is computed for each pair of species  
242 traits and environmental variables. We tested the significance of the trait-  
243 environment correlation by combining two permutation models (Dray &  
244 Legendre 2008). The first permutation randomizes site rows (or equivalently,  
245 environmental variables across sites) to test if communities in different  
246 environments have different trait values. The second permutation randomizes  
247 species columns (or equivalently, trait values across species) to test if trait-  
248 environment relationships are independent of community composition (Dray &  
249 Legendre 2008). Under the second null model, a consistent trait-environment  
250 relationship will not be significant if communities in similar environments have  
251 similar species composition. Thus even if the first permutation is significant  
252 but the second is not, we cannot know if the observed trait-environment  
253 correlation simply reflects random changes in trait values due to the shift in  
254 species composition. Hence, as recommended by Dray & Legendre (2008),  
255 we report the highest p-value of the two models. We then ran the fourth-corner  
256 analysis for each crop independently using 9999 permutations for each null  
257 model (R package “ade4”; Dray & Dufour 2007). No adjustments for p-values  
258 were made, but due to the high number of tests performed in the analyses,  
259 the possibility of significance by chance increases. Therefore, we mainly  
260 discuss effect sizes and only highlight results with significance level  $\leq 0.01$ ,  
261 while we consider  $0.01 > \alpha \leq 0.05$  to be relatively weakly supported  
262 associations.

263 **Effect trait analysis:** To determine which traits influenced functional

264 contribution of each species we ran separate generalized linear models with  
265 either visitation or per capita efficiency as response variables. Species traits  
266 were predictors. The best model based on AICc was selected. When  
267 differences between the best models were less than 2 we selected the simpler  
268 model. The analysis for efficiency was done at the species group level (see  
269 above: pollination function section). In order to obtain traits at the species  
270 group level we calculated the mean values over species belonging to the  
271 same group, weighted by the species mean abundance within the group. For  
272 categorical variables we chose the dominant level.

273 All statistical analyses were performed in R software, version 3.0.3 (R Core  
274 Team 2014).

## 275 **Results**

276 **Response traits:** Overall, we did not find a strong correlation between any  
277 ecological traits and the environmental variables analyzed. Some traits  
278 exhibited weak responses but they were not consistent across crops. For  
279 watermelon, small bees and those with short tongues tended to decline with  
280 increasing percentage of agriculture at 300m radius (Body size:  $r = 0.23$ ,  $p =$   
281  $0.03$ , Tongue length:  $r = 0.23$ ,  $p = 0.03$ ). Species nesting in stems were  
282 positively associated with heterogeneous landscapes at 1500m radius (Stem  
283 nesters:  $r = 0.12$ ,  $p = 0.04$ ). For cranberry and blueberry, we did not find any  
284 trait significantly associated with any of the landscape characteristics. A  
285 complete list of all comparisons is presented in Supporting Information (Table  
286 S3).

287 **Effect traits:** As for response traits, no traits were highly predictive of either  
288 visitation frequency or per visit efficiency across crops. For watermelon, no  
289 trait was selected on the best model for visitation frequency. However,  
290 pollination efficiency was positively correlated with body size and tongue  
291 length ( $R^2 = 0.75$ ,  $F_{2,9} = 17.07$ ,  $p < 0.001$ , Fig 2A). For cranberry, visitation  
292 frequency was positively related to cavity nesters ( $R^2 = 0.38$ ,  $F_{4,36} = 7.1$ ,  $p <$   
293  $0.0001$ , Fig 2B). This result was driven by *Bombus* species, which are the only  
294 cavity nesters in this data set. In contrast, efficiency per visit was not related  
295 to any trait. For blueberry, visitation frequency was positively related to diet  
296 specialism ( $R^2 = 0.37$ ,  $F_{1,20} = 13.5$ ,  $p = 0.001$ , Fig 2C), while efficiency per  
297 visit is positively related to tongue length ( $R^2 = 0.70$ ,  $F_{1,5} = 14.9$ ,  $p = 0.01$ ,  
298 Fig 2D). Model selection, can be found in Supporting Information (Table S4).

## 299 **Discussion:**

300 Identifying traits that characterize which species are more sensitive to land-  
301 use change or those that are functionally important is complex. We found  
302 evidence for response and effect traits but they differed among crop species  
303 as well as landscape variable used. Therefore, while some traits may be  
304 important in some contexts, no traits were generalizable enough to be used to  
305 predict how land-use change will influence the delivery of pollination services  
306 in other systems. Further, the relationships identified were weak, especially for  
307 response traits. This does not negate the importance of traits for  
308 understanding which mechanisms underlie species responses to land use  
309 change or pollination effectiveness, but it does suggest the commonly used

310 traits we studied here are not suitable for predictive purposes.

311 Being able to identify strong response traits would be a key tool for  
312 understanding extinction risk, and an asset for conservation planning.

313 However, characterizing extinction risk based on traits is challenging. Despite  
314 some generalities that emerge across taxa, with rare species, big species,  
315 specialists, and higher trophic levels being in general more sensitive to  
316 disturbances (Fisher & Owens 2004), there is a large variation in the response  
317 of the species with those traits (Fritz, Bininda-Emonds & Purvis 2009; Seguin  
318 *et al.* 2014). Work specifically on native bees has found that traits such as  
319 specialization, body size, and sociality may predict responses to land use  
320 (Winfree *et al.* 2009; Bommarco *et al.* 2010; Williams *et al.* 2010; Bartomeus  
321 *et al.* 2013b; De Palma *et al.* 2015). However, studies often find contrasting  
322 results. For example, De Palma *et al.* (2015) analyzed over 70,000 wild bee  
323 records and found that small species were most sensitive to agricultural land  
324 use, while others have found that larger species are more sensitive to  
325 agricultural land use and/or environmental change generally (Larsen, Williams  
326 & Kremen 2005; Bartomeus *et al.* 2013b; Rader *et al.* 2014), and some have  
327 found little effect of body size (Williams *et al.* 2010). Here, we only found a  
328 weak trend for big species to be more abundant in locally intense agricultural  
329 areas in watermelon, but this trend disappears when land use is measured at  
330 larger scales. Another trait, dietary specialization, is one of the few traits that  
331 has been generally linked to increased species sensitivity to environmental  
332 change (Williams *et al.* 2010; Scheper *et al.* 2014; De Palma *et al.* 2015), but  
333 here we found that floral specialist bees did not decline with intensifying

334 agriculture. If anything, specialization is positively associated with agricultural  
335 intensification in the blueberry system (Table S3), largely because the most  
336 abundant bee species in this system (*Andrena bradleyi*) is a specialist on the  
337 blueberry genus *Vaccinium*. Specialist bees observed in crop systems are  
338 likely to be specialized on the crop plant family as was the case in our data  
339 (e.g. *Habropoda sp.*, *Andrena bradleyi* in blueberry, but also *Peoponapis sp.*  
340 in watermelon and *Mellita americana* in cranberry). We would expect different  
341 responses from study designs that include natural habitat and a larger range  
342 of specialist host plants (Forrest et al. 2015, Bartomeus & Winfree 2013).

343 Effect traits have been even harder to identify for pollinators. The limited data  
344 published on particular plants suggests insects with larger bodies tend to  
345 deposit more pollen per flower visit, but this pollen was not well distributed on  
346 the stigma (Hoehn *et al.* 2008), or that the correlation between body size and  
347 per visit pollination function is low (Larsen, Williams & Kremen 2005). Our  
348 study supports the positive correlation between body size and per-visit pollen  
349 deposition in both watermelon and blueberry (although note that tongue  
350 length is correlated with body size in blueberry  $r = 0.76$ ), but not for cranberry.  
351 Hence, generality is difficult to achieve because a single pollinator trait, like  
352 big body size, may not lead to high pollination function in all contexts. Rather it  
353 seems likely that the most efficient trait will depend on the crop (Garibaldi *et*  
354 *al.* 2015). Moreover, the total pollination provided by a pollinator species is the  
355 product of visitation frequency and per capita efficiency (Kremen *et al.* 2005),  
356 two processes that may be governed by different traits.



357 If generalizable response and effect traits can be found, the final step will be  
358 to link response and effects to predict changes in ecosystem services. A  
359 positive association between the response and effect traits (Naeem & Wright  
360 2003) such that species with the strongest response to environmental change  
361 also had the strongest effect on function, indicates the land-use change has  
362 the potential for dramatic effects on ecosystem function. Whether response  
363 and effect traits are in general positively, negatively, or uncorrelated is an  
364 important question that has not yet been answered (Larsen, Williams &  
365 Kremen 2005). Despite the conceptual elegance of the response-effect trait  
366 framework, it is only effective if it is predictive, and strong evidence for the  
367 generality of traits has not yet been found. For example, even the very  
368 thorough and rigorously analyzed study of response-effect relationships by  
369 Larsen, Williams & Kremen (2005) is based on a non-significant weak  
370 relationship between pollinator per visit efficiency and body size. In our study,  
371 even the strongest correlations find for watermelon, where big species are  
372 less sensitive to local agricultural intensification and more efficient per visit,  
373 but not more frequent flower visitors than smaller species are too weak to be  
374 useful for predictive purposes.

375 Predictive response and/or effect traits are often assumed in the larger  
376 literature as well. For example, recent re-evaluations of community stability in  
377 food webs shows that using body size as proxy of extinction risk changes the  
378 outcome of the stability simulations (Brose *et al.* 2016). However, the  
379 assumption that body size is a good predictor of extinction risk is not directly  
380 validated. Given the correlation showing that bigger species are more

381 sensitive is usually weak (Fisher & Owens 2004), these kind of approaches  
382 could produce misleading outcomes.

383 Currently trait data may be too coarse to reveal ubiquitous response and  
384 effect traits for four reasons. First, some traits may simply reflect identity of  
385 genera or higher taxonomic groups. For example, some bumble bee species  
386 in our three systems (especially *B. impatiens*) are common, functionally  
387 dominant, and robust to extinction (Cariveau *et al.* 2013, Winfree *et al.* 2015).  
388 Some of the important response and effect traits that we found, such as cavity  
389 nesting and body size, may simply be proxies for bumble bees. Bumble bee  
390 species also share other traits (e.g. sociality) that are commonly used in trait  
391 analyses. Therefore, studies that don't include phylogenetic correlations may  
392 be simply characterizing the general relationship between disturbance and the  
393 functionally dominant bumble bees, or other dominant taxa. As there is a great  
394 variability in the responses to disturbance among bumble bee species  
395 (Cameron *et al.* 2011; Bartomeus *et al.* 2013b, Persson *et al.* 2015) this may  
396 also explain why some studies find big species to be more sensitive to land  
397 use change (Larsen, Williams & Kremen 2005) and other studies find the  
398 opposite (Rader *et al.* 2014, this study). Second, traits may interact in complex  
399 ways and single traits may be not able to capture responses and functional  
400 contributions across species (e.g. Bommarco *et al.* 2010, De Palma *et al.*  
401 2015). Third, phenotypical variability within species, usually ignored in trait-  
402 based approaches, may play a more important role than previously though  
403 (Bolnik *et al.* 2011). Finally, the most important traits may not have been  
404 studied. Response traits such as dispersal ability, fecundity, and nest

405 microclimate/soil type, and effect traits like floral visitation behavior or  
406 hairiness may be better predictors than the traits we have now. However, if  
407 these traits are not easy to measure across bee species, they may be of little  
408 use. Traits databases that include an increasing number of traits and agreed-  
409 upon measurement techniques similar to those used in plant ecology (Kattge  
410 *et al.* 2011) but that are also open-access may lead to significant  
411 advancements in functional trait ecology in wild bees.

412 There is a call to be more predictive in ecology (Petchey *et al.* 2015). The use  
413 of traits to predict species responses and subsequent changes in ecosystem  
414 services is a potentially powerful approach. This is especially the case for  
415 organisms such as insects where species identification is challenging and  
416 detailed species-level natural history information is lacking. The ability to  
417 effectively use a trait framework is becoming controversial because studies  
418 thus far have not clearly related specific traits to specific threats or functions  
419 (Didham *et al.* 2016; Shipley *et al.* 2016). A growing number of studies are  
420 working to address the complexity and increase the predictability of this  
421 framework (e.g. Laughlin & Messier 2015). However, until these approaches  
422 yield consistent patterns across systems, site-specific species identity and  
423 monitoring may at present be the best measure for predicting changes in  
424 ecosystem services as a result of land-use change. A few dominant species  
425 often drive ecosystem functioning (Kleijn *et al.* 2015; Winfree *et al.* 2015).  
426 Identifying the sensitivity of the functionally dominant species may be the best  
427 proxy thus far for predicting effects of species loss in ecosystem function.

428 **Acknowledgments:**

429 We thank Scott Chamberlain for help with BLADJ. IB was supported by  
430 project Beefun (PCIG14-GA-2013-631653) funded by EU.

431 **Data Accessibility:** All data and code used in this manuscript is accessible in  
432 github ([https://github.com/ibartomeus/RE\\_traits](https://github.com/ibartomeus/RE_traits)) and will be archived on  
433 acceptance in figshare.

434 **References:**

- 435 Bartomeus, I., Ascher, J.S., Gibbs, J., Danforth, B.N., Wagner, D.L., Hedtke, S.M. *et al.* (2013a) Data from: Historical changes in northeastern US bee pollinators  
436 related to shared ecological traits. Dryad Data Repository.  
437  
438 Bartomeus, I., Ascher, J.S., Gibbs, J., Danforth, B.N., Wagner, D.L., Hedtke, S.M.  
439 *et al.* (2013b) Historical changes in northeastern US bee pollinators related to  
440 shared ecological traits. *Proceedings of the National Academy of Sciences,*  
441 *USA*, **110**, 4656–4660.  
442 Bartomeus, I. & Winfree, R. (2013) Pollinator declines: reconciling scales and  
443 implications for ecosystem services. *F1000Res*, **2**, 146.  
444 Beaulieu, J.M., Leitch, I.J. & Knight, C.A. (2007) Genome size evolution in relation to  
445 leaf strategy and metabolic rates revisited. *Annals of Botany*, **99**, 495-505.  
446 Benjamin, F.E., Reilly, J.R. & Winfree, R. (2014) Pollinator body size mediates the  
447 scale at which land use drives crop pollination services. *Journal of Applied*  
448 *Ecology*, **51**, 440-449.  
449 Blüthgen, N., Frund, J., Vazquez, D.P. & Menzel, F. (2008) What do interaction  
450 network metrics tell us about specialization and biological traits? *Ecology*, **89**,  
451 3387-3399.  
452 Bommarco, R., Biesmeijer, J.C., Meyer, B., Potts, S.G., Poyry, J., Roberts, S.P. *et al.*  
453 (2010) Dispersal capacity and diet breadth modify the response of wild bees  
454 to habitat loss. *Proceedings of the Royal Society of London, Series B:*  
455 *Biological Sciences*, **277**, 2075-2082.  
456 Bolnick, D.I., Amarasekare, P., Araújo, M.S., Bürger, R., Levine, J.M., Novak, M.,  
457 Rudolf, V.H., Schreiber, S.J., Urban, M.C., Vasseur, D.A. (2011) Why  
458 intraspecific trait variation matters in community ecology. *Trends in ecology &*  
459 *evolution*. **26**(4):183-92.  
460 Brose, U., Blanchard, J.L., Eklof, A., Galiana, N., Hartvig, M., M, R.H. *et al.* (2016)  
461 Predicting the consequences of species loss using size-structured biodiversity  
462 approaches. *Biological Reviews of the Cambridge Philosophical Society*,  
463 Epub ahead of print.  
464 Cadotte, M.W., Carscadden, K. & Mirotnick, N. (2011) Beyond species: functional

- 465 diversity and the maintenance of ecological processes and services. *Journal*  
466 *of Applied Ecology*, **48**, 1079-1087.
- 467 Cameron, S.A., Lozier, J.D., Strange, J.P., Koch, J.B., Cordes, N., Solter, L.F. *et al.*  
468 (2011) Patterns of widespread decline in North American bumble bees.  
469 *Proceedings of the National Academy of Sciences, USA*, **108**, 662-667.
- 470 Cane, J. (1987) Estimation of bee size using intertegular span (Apoidea). *Journal of*  
471 *the Kansas Entomological Society*, **60**, 145-147.
- 472 Cardinale, B.J., Duffy, J.E., Gonzalez, A., Hooper, D.U., Perrings, C., Venail, P. *et al.*  
473 (2012) Biodiversity loss and its impact on humanity. *Nature*, **486**, 59-67.
- 474 Cariveau, D.P., Nayak, G.K., Bartomeus, I., Zientek, J., Ascher, J.S., Gibbs, J. *et al.*  
475 (2016) The allometry of bee proboscis length and its uses in ecology. *PLoS*  
476 *One*, **11**, e0151482.
- 477 Cariveau, D.P., Williams, N.M., Benjamin, F.E. & Winfree, R. (2013) Response  
478 diversity to land use occurs but does not consistently stabilise ecosystem  
479 services provided by native pollinators. *Ecology Letters*, **16**, 903-911.
- 480 Chamberlain, S.A. & Szocs, E. (2013) taxize: taxonomic search and retrieval in R.  
481 *F1000Res*, **2**, 191.
- 482 De Palma, A., Kuhlmann, M., Roberts, S.P.M., Potts, S.G., Börger, L., Hudson, L.N.  
483 *et al.* (2015) Ecological traits affect the sensitivity of bees to land-use  
484 pressures in European agricultural landscapes. *Journal of Applied Ecology*,  
485 **52**, 1567–1577.
- 486 Deguines, N., Jono, C., Baude, M., Henry, M., Julliard, R. & Fontaine, C. (2014)  
487 Large-scale trade-off between agricultural intensification and crop pollination  
488 services. *Frontiers in Ecology and the Environment*, **12**, 212-217.
- 489 Devictor, V., Julliard, R. & Jiguet, F. (2008) Distribution of specialist and generalist  
490 species along spatial gradients of habitat disturbance and fragmentation.  
491 *Oikos*, **117**, 507-514.
- 492 Diaz, S., Kattge, J., Cornelissen, J.H., Wright, I.J., Lavorel, S., Dray, S. *et al.* (2016)  
493 The global spectrum of plant form and function. *Nature*, **529**, 167-171.
- 494 Didham, R.K., Leather, S.R., Basset, Y. & Stewart, A. (2016) Circle the bandwagons  
495 - challenges mount against the theoretical foundations of applied functional  
496 trait and ecosystem service research. *Insect Conservation and Diversity*, **9**, 1-  
497 3.
- 498 Dray, S. & Dufour, A.B. (2007) The ade4 package: Implementing the duality diagram  
499 for ecologists. *Journal of Statistical Software*, **22**, 1-20.
- 500 Dray, S. & Legendre, P. (2008) Testing the species traits–environment relationships:  
501 The fourth-corner problem revisited. *Ecology*, **89**, 3400-3412.
- 502 Ellis, E.C., Klein Goldewijk, K., Siebert, S., Lightman, D. & Ramankutty, N. (2010)  
503 Anthropogenic transformation of the biomes, 1700 to 2000. *Global Ecology*  
504 *and Biogeography*, **19**, 589-606.
- 505 Fisher, D.O. & Owens, I.P. (2004) The comparative method in conservation biology.  
506 *Trends in Ecology & Evolution*, **19**, 391-398.
- 507 Fritz, S.A., Bininda-Emonds, O.R. & Purvis, A. (2009) Geographical variation in  
508 predictors of mammalian extinction risk: big is bad, but only in the tropics.  
509 *Ecology Letters*, **12**, 538-549.
- 510 Forrest, J.R.K., Thorp R.W., Kremen, C. & Williams, N.M. (2015) Contrasting  
511 patterns in species and functional-trait diversity of bees in an agricultural  
512 landscape. *The Journal of Applied Ecology*, **52**, 706–15.

- 513 Gagic, V., Bartomeus, I., Jonsson, T., Taylor, A., Winqvist, C., Fischer, C. *et al.*  
514 (2015) Functional identity and diversity of animals predict ecosystem  
515 functioning better than species-based indices. *Proceedings of the Royal*  
516 *Society of London, Series B: Biological Sciences*, **282**.
- 517 Garibaldi, L.A., Bartomeus, I., Bommarco, R., Klein, A.M., Cunningham, S.A., Aizen,  
518 M.A. *et al.* (2015) Trait matching of flower visitors and crops predicts fruit set  
519 better than trait diversity. *Journal of Applied Ecology*, **52**, 1436–1444.
- 520 Garibaldi, L.A., Steffan-Dewenter, I., Kremen, C., Morales, J.M., Bommarco, R.,  
521 Cunningham, S.A. *et al.* (2011) Stability of pollination services decreases with  
522 isolation from natural areas despite honey bee visits. *Ecology Letters*, **14**,  
523 1062-1072.
- 524 Greenleaf, S.S., Williams, N.M., Winfree, R. & Kremen, C. (2007) Bee foraging  
525 ranges and their relationship to body size. *Oecologia*, **153**, 589-596.
- 526 Hoehn, P., Tschardtke, T., Tylianakis, J.M. & Steffan-Dewenter, I. (2008) Functional  
527 group diversity of bee pollinators increases crop yield. *Proceedings of the*  
528 *Royal Society B-Biological Sciences*, **275**, 2283-2291.
- 529 Kattge, J., Díaz, S., Lavorel, S., Prentice, I.C., Leadley, P., Bönlisch, G. *et al.* (2011)  
530 TRY - a global database of plant traits. *Global Change Biology*, **17**, 2905-  
531 2935.
- 532 Kells, A.R. & Goulson, D. (2003) Preferred nesting sites of bumblebee queens  
533 (Hymenoptera: Apidae) in agroecosystems in the UK. *Biological Conservation*,  
534 **109**, 165-174.
- 535 Kleijn, D., Baquero, R.A., Clough, Y., Diaz, M., De Esteban, J., Fernandez, F. *et al.*  
536 (2006) Mixed biodiversity benefits of agri-environment schemes in five  
537 European countries. *Ecology Letters*, **9**, 243-254; discussion 254-247.
- 538 Kleijn, D., Winfree, R., Bartomeus, I., Carvalheiro, L.G., Henry, M., Isaacs, R. *et al.*  
539 (2015) Delivery of crop pollination services is an insufficient argument for wild  
540 pollinator conservation. *Nature Communications*, **6**, 7414.
- 541 Klein, A.M., Vaissiere, B.E., Cane, J.H., Steffan-Dewenter, I., Cunningham, S.A.,  
542 Kremen, C. *et al.* (2007) Importance of pollinators in changing landscapes for  
543 world crops. *Proceedings of the Royal Society of London, Series B: Biological*  
544 *Sciences*, **274**, 303-313.
- 545 Kremen, C. (2005) Managing ecosystem services: what do we need to know about  
546 their ecology? *Ecology Letters*, **8**, 468-479.
- 547 Kremen, C., Williams, N.M., Aizen, M.A., Gemmill-Herren, B., LeBuhn, G., Minckley,  
548 R. *et al.* (2007) Pollination and other ecosystem services produced by mobile  
549 organisms: a conceptual framework for the effects of land-use change.  
550 *Ecology Letters*, **10**, 299-314.
- 551 Larsen, T.H., Williams, N.W. & Kremen, C. (2005) Extinction order and altered  
552 community structure rapidly disrupt ecosystem functioning. *Ecology Letters*, **8**,  
553 538-547.
- 554 Laughlin, D.C. & Messier, J. (2015) Fitness of multidimensional phenotypes in  
555 dynamic adaptive landscapes. *Trends in Ecology & Evolution*, **30**, 487-496.
- 556 Lavorel, S. & Garnier, E. (2002) Predicting changes in community composition and  
557 ecosystem functioning from plant traits: revisiting the Holy Grail. *Functional*  
558 *Ecology*, **16**, 545-556.
- 559 Legendre, P., Galzin, R. & Harmelin-Vivien, M.L. (1997) Relating behavior to habitat:  
560 Solutions to the fourth-corner problem. *Ecology*, **78**, 547-562.

- 561 McGill, B.J., Enquist, B.J., Weiher, E. & Westoby, M. (2006) Rebuilding community  
562 ecology from functional traits. *Trends in Ecology & Evolution*, **21**, 178-185.
- 563 Naeem, S. & Wright, J.P. (2003) Disentangling biodiversity effects on ecosystem  
564 functioning: deriving solutions to a seemingly insurmountable problem.  
565 *Ecology Letters*, **6**, 567-579.
- 566 Nipperess, D.A. & Matsen, F.A.t. (2013) The mean and variance of phylogenetic  
567 diversity under rarefaction. *Methods in Ecology and Evolution*, **4**, 566-572.
- 568 Öckinger, E., Schweiger, O., Crist, T.O., Debinski, D.M., Krauss, J., Kuussaari, M. *et al.*  
569 (2010) Life-history traits predict species responses to habitat area and  
570 isolation: a cross-continental synthesis. *Ecology Letters*, **13**, 969-979.
- 571 Pereira, H.M., Leadley, P.W., Proenca, V., Alkemade, R., Scharlemann, J.P.,  
572 Fernandez-Manjarres, J.F. *et al.* (2010) Scenarios for global biodiversity in the  
573 21st century. *Science*, **330**, 1496-1501.
- 574 Persson, A.S., Rundlöf, M., Clough, Y. & Smith, H.G. (2015) Bumble bees show trait-  
575 dependent vulnerability to landscape simplification. *Biodiversity and  
576 Conservation*, **24**, 3469-3489.
- 577 Petchey, O.L., Pontarp, M., Massie, T.M., Kefi, S., Ozgul, A., Weilenmann, M. *et al.*  
578 (2015) The ecological forecast horizon, and examples of its uses and  
579 determinants. *Ecology Letters*, **18**, 597-611.
- 580 Powney, G.D., Preston, C.D., Purvis, A., Van Landuyt, W. & Roy, D.B. (2014) Can  
581 trait-based analyses of changes in species distribution be transferred to new  
582 geographic areas? *Global Ecology and Biogeography*, **23**, 1009-1018.
- 583 R Core Team (2014) R: A language and environment for statistical computing. *R  
584 Foundation for Statistical Computing, Vienna, Austria*. R Foundation for  
585 Statistical Computing, Vienna, Austria.
- 586 Rader, R., Bartomeus, I., Garibaldi, L.A., Garratt, M.P., Howlett, B.G., Winfree, R. *et al.*  
587 (2016) Non-bee insects are important contributors to global crop  
588 pollination. *Proceedings of the National Academy of Sciences USA*, **113**, 146-  
589 151.
- 590 Rader, R., Bartomeus, I., Tylianakis, J.M., Laliberté, E. & van Kleunen, M. (2014)  
591 The winners and losers of land use intensification: pollinator community  
592 disassembly is non-random and alters functional diversity. *Diversity and  
593 Distributions*, **20**, 908-917.
- 594 Scheper, J., Reemer, M., van Kats, R., Ozinga, W.A., van der Linden, G.T.,  
595 Schaminee, J.H. *et al.* (2014) Museum specimens reveal loss of pollen host  
596 plants as key factor driving wild bee decline in The Netherlands. *Proceedings  
597 of the National Academy of the Sciences USA*.
- 598 Schleuning, M., Fründ, J. & García, D. (2015) Predicting ecosystem functions from  
599 biodiversity and mutualistic networks: an extension of trait-based concepts to  
600 plant-animal interactions. *Ecography*, **38**, 380-392.
- 601 Schwartz, M.W., Brigham, C.A., Hoeksema, J.D., Lyons, K.G., Mills, M.H. & van  
602 Mantgem, P.J. (2000) Linking biodiversity to ecosystem function: implications  
603 for conservation ecology. *Oecologia*, **122**, 297-305.
- 604 Seguin, A., Harvey, E., Archambault, P., Nozais, C. & Gravel, D. (2014) Body size as  
605 a predictor of species loss effect on ecosystem functioning. *Scientific Reports*,  
606 **4**, 4616.
- 607 Shipley, B., De Bello, F., Cornelissen, J.H., Laliberte, E., Laughlin, D.C. & Reich,  
608 P.B. (2016) Reinforcing loose foundation stones in trait-based plant ecology.

- 609           *Oecologia*, **180**, 923-931.
- 610 Webb, C.O. (2000) Exploring the phylogenetic structure of ecological communities:  
611           An example for rain forest trees. *American Naturalist*, **156**, 145-155.
- 612 Webb, C.O., Ackerly, D.D. & Kembel, S.W. (2008) Phylocom: software for the  
613           analysis of phylogenetic community structure and trait evolution.  
614           *Bioinformatics*, **24**, 2098-2100.
- 615 Wikström, N., Savolainen, V. & Chase, M.W. (2001) Evolution of the angiosperms:  
616           calibrating the family tree. *Proc Biol Sci*, **268**, 2211-2220.
- 617 Williams, N.M., Crone, E.E., Roulston, T.a.H., Minckley, R.L., Packer, L. & Potts,  
618           S.G. (2010) Ecological and life-history traits predict bee species responses to  
619           environmental disturbances. *Biological Conservation*, **143**, 2280-2291.
- 620 Winfree, R., Aguilar, R., Vazquez, D.P., LeBuhn, G. & Aizen, M.A. (2009) A meta-  
621           analysis of bees' responses to anthropogenic disturbance. *Ecology*, **90**, 2068-  
622           2076.
- 623 Winfree, R., J, W.F., Williams, N.M., Reilly, J.R. & Cariveau, D.P. (2015)  
624           Abundance of common species, not species richness, drives delivery of  
625           a real-world ecosystem service. *Ecology Letters*, **18**, 626-635.
- 626 Winfree, R., Williams, N.M., Dushoff, J. & Kremen, C. (2014) Species  
627           abundance, not diet breadth, drives the persistence of the most linked  
628           pollinators as plant-pollinator networks disassemble. *American*  
629           *Naturalist*, **183**, 600-611.
- 630



631 **Tables and Figures**

632 **Fig. 1: Relationships between traits and environmental variables for A)**

633 watermelon, B) blueberry and c) cranberry. Positive significant correlations

634 are in red ( $p < 0.05$ ). Note no correlation is significant despite all the

635 combinations tested for both blueberry and cranberry. D) Detail of the

636 relationship between body size (visualized as the community weighted means

637 for each community) and percentage of agriculture at 300 meter radii.

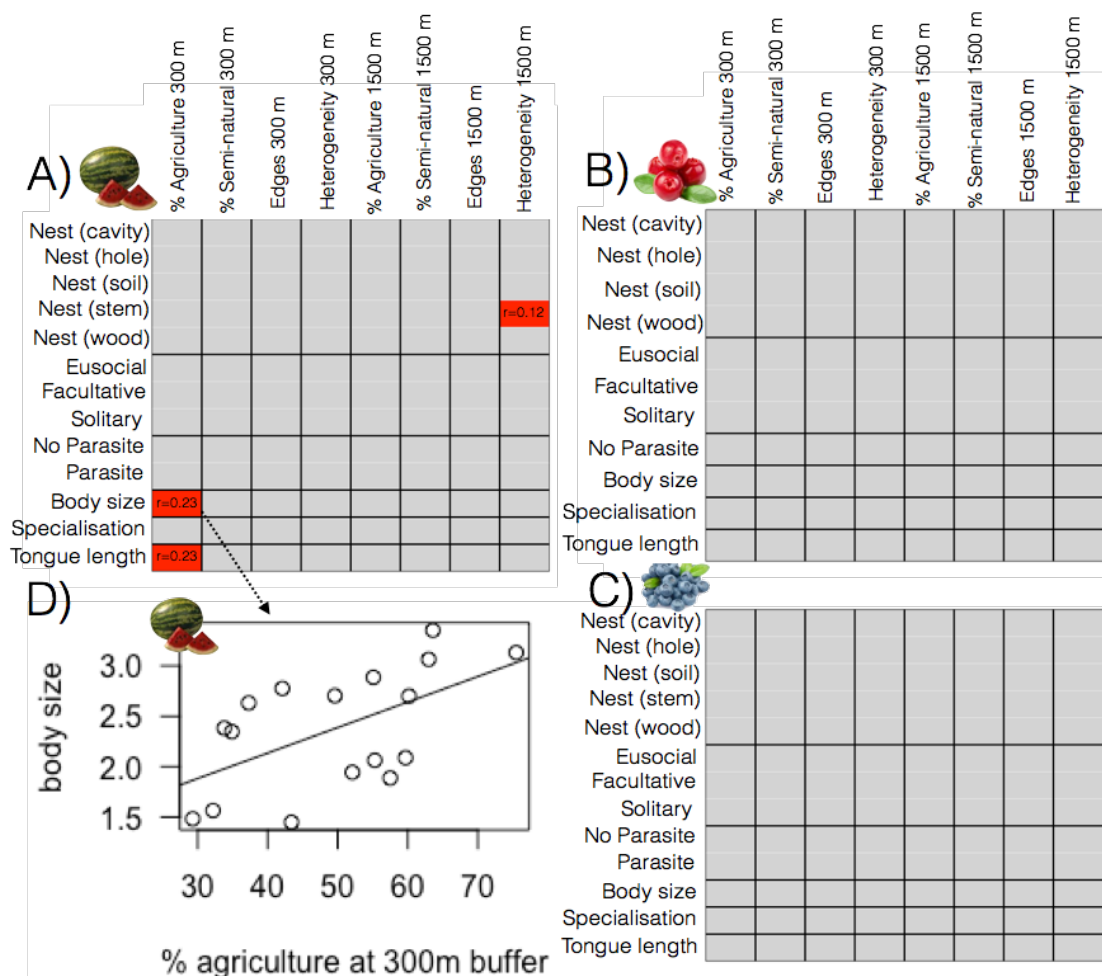

638

639

640 **Fig. 2: Multipanel plot showing the relationships between species traits**  
641 **and pollination function**, which is decomposed into efficiency (pollen  
642 deposited per flower visit) and frequency of flower visits. A) watermelon, B)  
643 cranberry, C-D) blueberry.

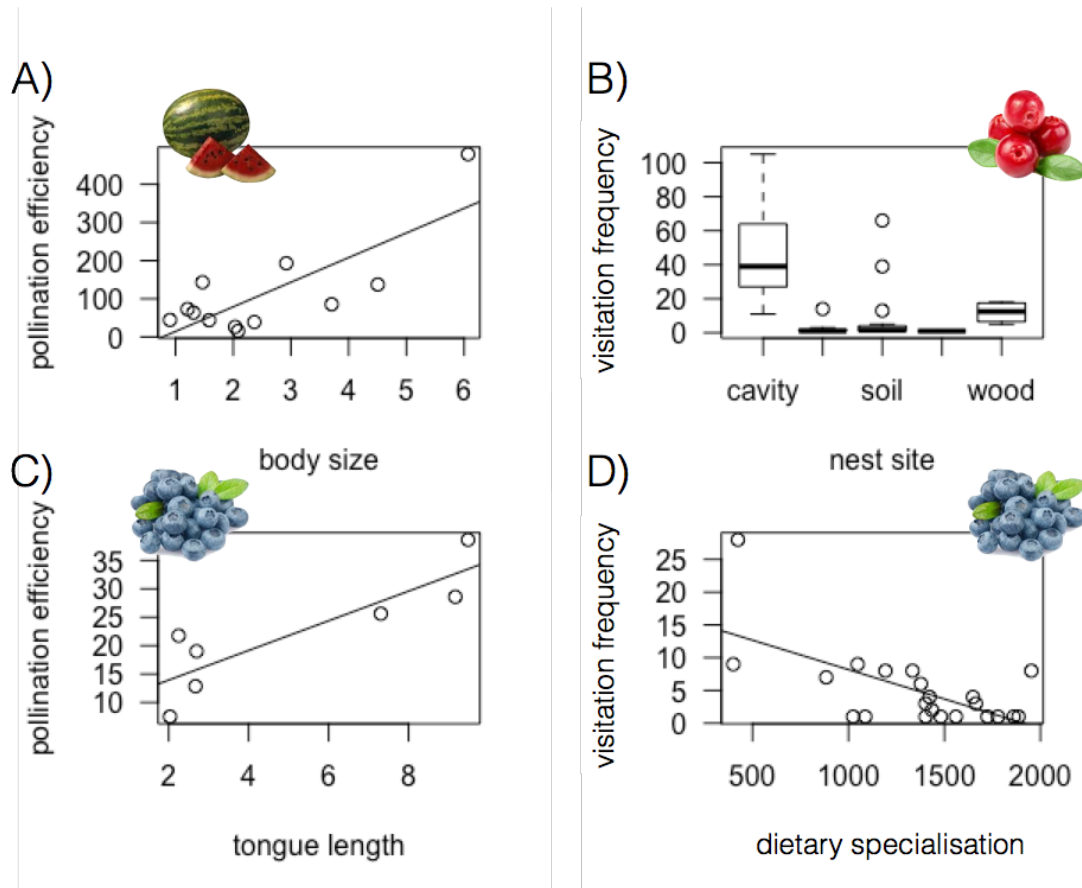

644

645

## 646 Supporting Information

647 Table S1: Equivalencies between species and groups used for single visit

648 data.

| <b>Crop</b> | <b>Species</b>                  | <b>Single Visit Group</b> | <b>Percentage within group</b> |
|-------------|---------------------------------|---------------------------|--------------------------------|
| Blueberry   | <i>Andrena_banksi</i>           | MED_AND                   | 0.00                           |
| Blueberry   | <i>Andrena_barbara</i>          | MED_AND                   | 0.00                           |
| Blueberry   | <i>Andrena_bradleyi</i>         | MED_AND                   | 0.93                           |
| Blueberry   | <i>Andrena_carlini</i>          | LG_AND                    | 0.12                           |
| Blueberry   | <i>Andrena_carolina</i>         | LG_AND                    | 0.01                           |
| Blueberry   | <i>Andrena_cressonii</i>        | LG_AND                    | 0.01                           |
| Blueberry   | <i>Andrena_fenningeri</i>       | MED_AND                   | 0.01                           |
| Blueberry   | <i>Andrena_hilaris</i>          | MED_AND                   | 0.00                           |
| Blueberry   | <i>Andrena_ilicis</i>           | MED_AND                   | 0.00                           |
| Blueberry   | <i>Andrena_imitatrix</i>        | MED_AND                   | 0.01                           |
| Blueberry   | <i>Andrena_mandibularis</i>     | MED_AND                   | 0.00                           |
| Blueberry   | <i>Andrena_morrisonella</i>     | MED_AND                   | 0.01                           |
| Blueberry   | <i>Andrena_screpteroopsis</i>   | MED_AND                   | 0.00                           |
| Blueberry   | <i>Andrena_vicina</i>           | LG_AND                    | 0.86                           |
| Blueberry   | <i>Augochlora_pura</i>          | Green                     | 0.56                           |
| Blueberry   | <i>Augochlorella_aurata</i>     | Green                     | 0.44                           |
| Blueberry   | <i>Bombus_bimaculatus</i>       | Bom_Q                     | 0.24                           |
| Blueberry   | <i>Bombus_griseocollis</i>      | Bom_Q                     | 0.49                           |
| Blueberry   | <i>Bombus_impatiens</i>         | Bom_Q                     | 0.18                           |
| Blueberry   | <i>Bombus_perplexus</i>         | Bom_Q                     | 0.08                           |
| Blueberry   | <i>Ceratina_calcarata/dupla</i> | Dialictus                 | 0.22                           |
| Blueberry   | <i>Colletes_inaequalis</i>      | Coll                      | 0.26                           |
| Blueberry   | <i>Colletes_thoracicus</i>      | Coll                      | 0.09                           |
| Blueberry   | <i>Colletes_validus</i>         | Coll                      | 0.65                           |
| Blueberry   | <i>Habropoda_laboriosa</i>      | HAB                       | 1.00                           |
| Blueberry   | <i>Lasioglossum_acuminatum</i>  | Dialictus                 | 0.02                           |
| Blueberry   | <i>Lasioglossum_coeruleum</i>   | Dialictus                 | 0.02                           |
| Blueberry   | <i>Lasioglossum_fuscipenne</i>  | Dialictus                 | 0.02                           |
| Blueberry   | <i>Lasioglossum_leucomum</i>    | Dialictus                 | 0.02                           |
| Blueberry   | <i>Lasioglossum_oblongum</i>    | Dialictus                 | 0.10                           |
| Blueberry   | <i>Lasioglossum_pilosum</i>     | Dialictus                 | 0.15                           |
| Blueberry   | <i>Lasioglossum_versatum</i>    | Dialictus                 | 0.02                           |
| Blueberry   | <i>Lasioglossum_weemsi</i>      | Dialictus                 | 0.07                           |
| Blueberry   | <i>Lasioglossum_zephyrum</i>    | Dialictus                 | 0.05                           |

|           |                                    |                            |      |
|-----------|------------------------------------|----------------------------|------|
| Blueberry | <i>Nomada_luteola</i>              | Dialictus                  | 0.02 |
| Blueberry | <i>Osmia_taurus</i>                | Dialictus                  | 0.02 |
| Blueberry | <i>Osmia_cornifrons</i>            | Dialictus                  | 0.02 |
| Blueberry | <i>Osmia_pumila</i>                | Dialictus                  | 0.07 |
| Blueberry | <i>Sphecodes_aroniae</i>           | Dialictus                  | 0.02 |
| Blueberry | <i>Sphecodes_stygius</i>           | Dialictus                  | 0.02 |
| Blueberry | <i>Xylocopa_virginica</i>          | XYL                        | 1.00 |
| Cranberry | <i>Agapostemon_splendens</i>       | Green                      | 0.02 |
| Cranberry | <i>Andrena_cressonii</i>           | Melitta                    | 0.01 |
| Cranberry | <i>Andrena_imitatrix</i>           | Melitta                    | 0.01 |
| Cranberry | <i>Andrena_morrisonella</i>        | Melitta                    | 0.01 |
| Cranberry | <i>Andrena_spiraeana</i>           | Melitta                    | 0.01 |
| Cranberry | <i>Andrena_vicina</i>              | Melitta                    | 0.02 |
| Cranberry | <i>Augochlora_pura</i>             | Green                      | 0.16 |
| Cranberry | <i>Augochlorella_aurata</i>        | Green                      | 0.63 |
| Cranberry | <i>Augochloropsis_metallica</i>    | Green                      | 0.16 |
| Cranberry | <i>Augochloropsis_sumptuosa</i>    | Green                      | 0.03 |
| Cranberry | <i>Bombus_bimaculatus</i>          | <i>Bombus_bimaculatus</i>  | 1.00 |
| Cranberry | <i>Bombus_citrinus</i>             | <i>Bombus_spp</i>          | 0.50 |
| Cranberry | <i>Bombus_griseocollis</i>         | <i>Bombus_griseocollis</i> | 1.00 |
| Cranberry | <i>Bombus_impatiens</i>            | <i>Bombus_impatiens</i>    | 1.00 |
| Cranberry | <i>Bombus_perplexus</i>            | <i>Bom_pervag</i>          | 0.85 |
| Cranberry | <i>Bombus_sandersoni</i>           | <i>Bombus_spp</i>          | 0.50 |
| Cranberry | <i>Bombus_vagans</i>               | <i>Bom_pervag</i>          | 0.15 |
| Cranberry | <i>Ceratina_calcarata/dupla</i>    | Small_black                | 0.12 |
| Cranberry | <i>Coelioxys_immaculata</i>        | Megachile                  | 0.02 |
| Cranberry | <i>Coelioxys_porterae</i>          | Megachile                  | 0.04 |
| Cranberry | <i>Coelioxys_sayi</i>              | Megachile                  | 0.02 |
| Cranberry | <i>Colletes_consors</i>            | Megachile                  | 0.02 |
| Cranberry | <i>Halictus_rubicundus</i>         | Small_black                | 0.02 |
| Cranberry | <i>Heriades_carinatus</i>          | <i>Osmia</i>               | 0.08 |
| Cranberry | <i>Hoplitis_truncata</i>           | <i>Osmia</i>               | 0.12 |
| Cranberry | <i>Hylaeus_affinis</i>             | Small_black                | 0.08 |
| Cranberry | <i>Lasioglossum_apopkense</i>      | Small_black                | 0.01 |
| Cranberry | <i>Lasioglossum_coeruleum</i>      | Small_black                | 0.01 |
| Cranberry | <i>Lasioglossum_creberrimum</i>    | Small_black                | 0.02 |
| Cranberry | <i>Lasioglossum_fuscipenne</i>     | Small_black                | 0.05 |
| Cranberry | <i>Lasioglossum_georgeickworti</i> | Small_black                | 0.05 |
| Cranberry | <i>Lasioglossum_lineatulum</i>     | Small_black                | 0.01 |
| Cranberry | <i>Lasioglossum_oblongum</i>       | Small_black                | 0.15 |
| Cranberry | <i>Lasioglossum_pilosum</i>        | Small_black                | 0.02 |
| Cranberry | <i>Lasioglossum_planatum</i>       | Small_black                | 0.02 |
| Cranberry | <i>Lasioglossum_subviridatum</i>   | Small_black                | 0.17 |
| Cranberry | <i>Lasioglossum_trigeminum</i>     | Small_black                | 0.02 |

|            |                                 |             |      |
|------------|---------------------------------|-------------|------|
| Cranberry  | <i>Lasioglossum_versatum</i>    | Small_black | 0.04 |
| Cranberry  | <i>Megachile_addenda</i>        | Megachile   | 0.22 |
| Cranberry  | <i>Megachile_gemula</i>         | Megachile   | 0.32 |
| Cranberry  | <i>Megachile_mendica</i>        | Megachile   | 0.28 |
| Cranberry  | <i>Megachile_texana</i>         | Megachile   | 0.08 |
| Cranberry  | <i>Melitta_americana</i>        | Melitta     | 0.95 |
| Cranberry  | <i>Nomada_bella/lepida</i>      | Small_black | 0.01 |
| Cranberry  | <i>Nomada_pygmaea</i>           | Small_black | 0.01 |
| Cranberry  | <i>Nomada_rodecki</i>           | Small_black | 0.07 |
| Cranberry  | <i>Osmia_inspergens</i>         | Osmia       | 0.07 |
| Cranberry  | <i>Osmia_pumila</i>             | Osmia       | 0.13 |
| Cranberry  | <i>Osmia_virga</i>              | Osmia       | 0.60 |
| Cranberry  | <i>Panurginus_atramontensis</i> | Small_black | 0.09 |
| Cranberry  | <i>Sphecodes_aroniae</i>        | Small_black | 0.03 |
| Cranberry  | <i>Sphecodes_fattigi</i>        | Small_black | 0.01 |
| Cranberry  | <i>Xylocopa_virginica</i>       | XYL         | 1.00 |
| Watermelon | <i>Agapostemon_sericeus</i>     | LG          | 0.25 |
| Watermelon | <i>Agapostemon_texanus</i>      | LG          | 0.11 |
| Watermelon | <i>Agapostemon_virescens</i>    | LG          | 0.52 |
| Watermelon | <i>Anthidium_oblongatum</i>     | LDS         | 0.03 |
| Watermelon | <i>Augochlora_pura</i>          | SG          | 0.80 |
| Watermelon | <i>Augochlorella_aurata</i>     | SG          | 0.20 |
| Watermelon | <i>Augochloropsis_metallica</i> | LG          | 0.11 |
| Watermelon | <i>Bombus_bimaculatus</i>       | BOM         | 0.01 |
| Watermelon | <i>Bombus_fervidus</i>          | BOM         | 0.00 |
| Watermelon | <i>Bombus_griseocollis</i>      | BOM         | 0.01 |
| Watermelon | <i>Bombus_impatiens</i>         | BOM         | 0.98 |
| Watermelon | <i>Bombus_perplexus</i>         | BOM         | 0.00 |
| Watermelon | <i>Bombus_vagans</i>            | BOM         | 0.00 |
| Watermelon | <i>Calliopsis_andreniformis</i> | SD          | 0.03 |
| Watermelon | <i>Ceratina_calcarata/dupla</i> | CER         | 0.81 |
| Watermelon | <i>Ceratina_strenua</i>         | CER         | 0.19 |
| Watermelon | <i>Halictus_confusus</i>        | HAL_MDS     | 0.83 |
| Watermelon | <i>Halictus_ligatus</i>         | HAL_MDS     | 0.16 |
| Watermelon | <i>Halictus_parallelus</i>      | LDS         | 0.03 |
| Watermelon | <i>Halictus_rubicundus</i>      | LDS         | 0.56 |
| Watermelon | <i>Hoplitis_pilosifrons</i>     | HAL_MDS     | 0.00 |
| Watermelon | <i>Hoplitis_producta</i>        | HAL_MDS     | 0.00 |
| Watermelon | <i>Hylaeus_affinis</i>          | TD          | 0.01 |
| Watermelon | <i>Lasioglossum_admirandum</i>  | SD          | 0.01 |
| Watermelon | <i>Lasioglossum_albipenne</i>   | SD          | 0.00 |
| Watermelon | <i>Lasioglossum_atwoodi</i>     | SD          | 0.00 |
| Watermelon | <i>Lasioglossum_bruneri</i>     | SD          | 0.01 |
| Watermelon | <i>Lasioglossum_callidum</i>    | SD          | 0.01 |

|            |                                    |     |      |
|------------|------------------------------------|-----|------|
| Watermelon | <i>Lasioglossum_cattellae</i>      | TD  | 0.00 |
| Watermelon | <i>Lasioglossum_cinctipes</i>      | SD  | 0.00 |
| Watermelon | <i>Lasioglossum_coreopsis</i>      | TD  | 0.00 |
| Watermelon | <i>Lasioglossum_coriaceum</i>      | SD  | 0.00 |
| Watermelon | <i>Lasioglossum_cressonii</i>      | SD  | 0.01 |
| Watermelon | <i>Lasioglossum_ellisiae</i>       | TD  | 0.01 |
| Watermelon | <i>Lasioglossum_ephialtum</i>      | SD  | 0.02 |
| Watermelon | <i>Lasioglossum_georgeickworti</i> | SD  | 0.00 |
| Watermelon | <i>Lasioglossum_gotham</i>         | SD  | 0.00 |
| Watermelon | <i>Lasioglossum_illinoense</i>     | TD  | 0.05 |
| Watermelon | <i>Lasioglossum_imitatum</i>       | TD  | 0.59 |
| Watermelon | <i>Lasioglossum_laevissimum</i>    | SD  | 0.00 |
| Watermelon | <i>Lasioglossum_leucomomum</i>     | SD  | 0.02 |
| Watermelon | <i>Lasioglossum_leucozonium</i>    | LDS | 0.09 |
| Watermelon | <i>Lasioglossum_lineatulum</i>     | SD  | 0.00 |
| Watermelon | <i>Lasioglossum_mitchelli</i>      | TD  | 0.17 |
| Watermelon | <i>Lasioglossum_nymphaearum</i>    | SD  | 0.04 |
| Watermelon | <i>Lasioglossum_oblongum</i>       | SD  | 0.01 |
| Watermelon | <i>Lasioglossum_obscurum</i>       | SD  | 0.01 |
| Watermelon | <i>Lasioglossum_paradmirandum</i>  | TD  | 0.04 |
| Watermelon | <i>Lasioglossum_pectinatum</i>     | SD  | 0.00 |
| Watermelon | <i>Lasioglossum_pectorale</i>      | SD  | 0.02 |
| Watermelon | <i>Lasioglossum_pilosum</i>        | SD  | 0.28 |
| Watermelon | <i>Lasioglossum_planatum</i>       | SD  | 0.00 |
| Watermelon | <i>Lasioglossum_platyparium</i>    | SD  | 0.00 |
| Watermelon | <i>Lasioglossum_rozeni</i>         | SD  | 0.00 |
| Watermelon | <i>Lasioglossum_smilacinae</i>     | SD  | 0.00 |
| Watermelon | <i>Lasioglossum_subviridatum</i>   | SD  | 0.00 |
| Watermelon | <i>Lasioglossum_tegulare</i>       | TD  | 0.07 |
| Watermelon | <i>Lasioglossum_trigeminum</i>     | SD  | 0.02 |
| Watermelon | <i>Lasioglossum_truncatum</i>      | SD  | 0.01 |
| Watermelon | <i>Lasioglossum_versatum</i>       | SD  | 0.44 |
| Watermelon | <i>Lasioglossum_viridatum</i>      | SD  | 0.01 |
| Watermelon | <i>Lasioglossum_weemsi</i>         | TD  | 0.05 |
| Watermelon | <i>Lasioglossum_zephyrum</i>       | SD  | 0.04 |
| Watermelon | <i>Megachile_brevis</i>            | LDS | 0.06 |
| Watermelon | <i>Megachile_mendica</i>           | LDS | 0.18 |
| Watermelon | <i>Megachile_rotundata</i>         | LDS | 0.03 |
| Watermelon | <i>Megachile_sculpturalis</i>      | LDS | 0.03 |
| Watermelon | <i>Melissodes_bimaculata</i>       | MEL | 0.99 |
| Watermelon | <i>Melissodes_trinodis</i>         | MEL | 0.00 |
| Watermelon | <i>Nomada_articulata</i>           | TRI | 0.01 |
| Watermelon | <i>Peponapis_pruinosa</i>          | PEP | 1.00 |
| Watermelon | <i>Ptilothrix_bombiformis</i>      | MEL | 0.01 |

|            |                             |     |      |
|------------|-----------------------------|-----|------|
| Watermelon | <i>Triepeolus_lunatus</i>   | TRI | 0.01 |
| Watermelon | <i>Triepeolus_remigatus</i> | TRI | 0.98 |
| Watermelon | <i>Xylocopa_virginica</i>   | XYL | 1.00 |

649

650 Text S2: Datasets used for calculating dietary specialization: Six datasets  
651 were used to create the phylogenetic distance index. All data were collected in  
652 the region of the crop study. Specimens were collected using a hand net and  
653 the bee species and plant species were recorded. This resulted in a total of  
654 18,733 bee x plant interactions for species that were also in the crop dataset.  
655 The number of species, sites, and years of collection are as follows: 1) Pine  
656 barrens in 2003: 280 bee x plant interactions. Habitat types were extensive  
657 pine-oak forest (14 sites), forest fragments (14 sites), suburban back yards (7  
658 sites), and agricultural field borders (5 sites) in New Jersey (Winfree et al.  
659 2007). Bees were collected in temporally stratified sampling rounds between  
660 April and September. 2) NJPA: 3906 bee x plant interactions. Data collected  
661 on watermelon field margins at a total of 20 sites. Farm types included small-  
662 scale mixed farming, both crops and field margins, both organic and low-  
663 pesticide-input conventional. All bees were collected in three temporally  
664 stratified sampling rounds in July, in each of 3 years. 3) NFWF 3906 bee x  
665 plant interactions. Habitat types were old fields. Bees were collected in May  
666 through Sept at 25 sites for two years. *Lasioglossum* species were not  
667 included for this dataset due to recent changes in its taxonomy. 4) NSF 2006  
668 666 bee x plant interactions. Habitat types were deciduous forest fragments  
669 (13 sites), and suburban / urban yards (3 sites) and sites with extensive  
670 forests with diverse wildflower communities (4 sites). All bees were collected

671 in sampling rounds between April and early June. 5) CIG 4600 bee x plant  
 672 interactions. Site were comprised of old fields as well as pollinator  
 673 enhancement sites. Bees using were collected using a hand net from a total of  
 674 a total 18 sites in 2011-2013. For each bee specimen, the plant species was  
 675 recorded. 6) Cape May 5858 bee x plant interactions. This study included only  
 676 one site. The habitat was an old field that had been planted in 20 species of  
 677 native perennial plants. Sampling took place over 3 years in sampling rounds  
 678 that occurred in May through September.

679 Winfree, R. Griswold, T. & Kremen, C. (2007). Effect of human disturbance on  
 680 bee communities in a forested ecosystem. *Conservation Biology*. 21: 213-223.

681 Table S3: Fourth corner results showing correlations and p-values for each  
 682 trait. Significant values in bold.

| Crop       | Test                            | r     | Standard deviation | P-value |
|------------|---------------------------------|-------|--------------------|---------|
| watermelon | ag_300 / Nest_.cavity           | 0.19  | 1.92               | 0.05    |
| watermelon | open_300 / Nest_.cavity         | -0.09 | -0.83              | 0.43    |
| watermelon | forest_edge_300 / Nest_.cavity  | -0.05 | -0.31              | 0.71    |
| watermelon | shannonH_300 / Nest_.cavity     | -0.09 | -0.88              | 0.4     |
| watermelon | ag_1500 / Nest_.cavity          | -0.11 | -1                 | 0.33    |
| watermelon | open_1500 / Nest_.cavity        | -0.15 | -1.4               | 0.18    |
| watermelon | forest_edge_1500 / Nest_.cavity | -0.02 | -0.2               | 0.86    |
| watermelon | shannonH_1500 / Nest_.cavity    | -0.06 | -0.54              | 0.62    |
| watermelon | ag_300 / Nest_.hole             | 0     | 0.07               | 0.93    |
| watermelon | open_300 / Nest_.hole           | -0.03 | -0.85              | 0.32    |
| watermelon | forest_edge_300 / Nest_.hole    | -0.06 | -0.76              | 0.34    |
| watermelon | shannonH_300 / Nest_.hole       | -0.03 | -0.63              | 0.41    |
| watermelon | ag_1500 / Nest_.hole            | -0.03 | -0.54              | 0.41    |
| watermelon | open_1500 / Nest_.hole          | -0.05 | -0.94              | 0.22    |
| watermelon | forest_edge_1500 / Nest_.hole   | -0.03 | -0.65              | 0.36    |
| watermelon | shannonH_1500 / Nest_.hole      | -0.08 | -1.61              | 0.09    |
| watermelon | ag_300 / Nest_.soil             | -0.12 | -1.2               | 0.27    |
| watermelon | open_300 / Nest_.soil           | 0.11  | 1.16               | 0.27    |



|                   |                                   |             |             |             |
|-------------------|-----------------------------------|-------------|-------------|-------------|
| watermelon        | forest_edge_300 / Nest_.soil      | 0.01        | -0.07       | 0.95        |
| watermelon        | shannonH_300 / Nest_.soil         | 0.07        | 0.81        | 0.45        |
| watermelon        | ag_1500 / Nest_.soil              | 0.04        | 0.46        | 0.66        |
| watermelon        | open_1500 / Nest_.soil            | 0.07        | 0.73        | 0.5         |
| watermelon        | forest_edge_1500 / Nest_.soil     | -0.05       | -0.53       | 0.63        |
| watermelon        | shannonH_1500 / Nest_.soil        | 0.02        | 0.23        | 0.85        |
| watermelon        | ag_300 / Nest_.stem               | -0.08       | -1          | 0.26        |
| watermelon        | open_300 / Nest_.stem             | 0.03        | 0.44        | 0.66        |
| watermelon        | forest_edge_300 / Nest_.stem      | 0.01        | 0.11        | 0.93        |
| watermelon        | shannonH_300 / Nest_.stem         | 0.09        | 1.38        | 0.18        |
| watermelon        | ag_1500 / Nest_.stem              | 0           | 0.05        | 0.96        |
| watermelon        | open_1500 / Nest_.stem            | 0.07        | 0.87        | 0.27        |
| watermelon        | forest_edge_1500 / Nest_.stem     | 0.01        | 0.25        | 0.78        |
| <b>watermelon</b> | <b>shannonH_1500 / Nest_.stem</b> | <b>0.12</b> | <b>2.01</b> | <b>0.04</b> |
| watermelon        | ag_300 / Nest_.wood               | -0.03       | -0.22       | 0.76        |
| watermelon        | open_300 / Nest_.wood             | -0.06       | -0.84       | 0.43        |
| watermelon        | forest_edge_300 / Nest_.wood      | 0.05        | 0.66        | 0.52        |
| watermelon        | shannonH_300 / Nest_.wood         | -0.05       | -0.66       | 0.54        |
| watermelon        | ag_1500 / Nest_.wood              | 0.08        | 1.04        | 0.3         |
| watermelon        | open_1500 / Nest_.wood            | 0.04        | 0.51        | 0.59        |
| watermelon        | forest_edge_1500 / Nest_.wood     | 0.09        | 1.37        | 0.17        |
| watermelon        | shannonH_1500 / Nest_.wood        | -0.04       | -0.58       | 0.57        |
| watermelon        | ag_300 / Socia.Eusocial           | 0.02        | 0.18        | 0.91        |
| watermelon        | open_300 / Socia.Eusocial         | -0.01       | -0.09       | 0.93        |
| watermelon        | forest_edge_300 / Socia.Eusocial  | 0.04        | 0.27        | 0.86        |
| watermelon        | shannonH_300 / Socia.Eusocial     | 0.08        | 0.79        | 0.48        |
| watermelon        | ag_1500 / Socia.Eusocial          | -0.04       | -0.36       | 0.74        |
| watermelon        | open_1500 / Socia.Eusocial        | -0.16       | -1.61       | 0.11        |
|                   | forest_edge_1500 /                |             |             |             |
| watermelon        | Socia.Eusocial                    | -0.06       | -0.61       | 0.56        |
| watermelon        | shannonH_1500 / Socia.Eusocial    | 0.01        | 0.12        | 0.92        |
| watermelon        | ag_300 / Socia.fac_social         | -0.07       | -0.64       | 0.54        |
| watermelon        | open_300 / Socia.fac_social       | 0.03        | 0.45        | 0.72        |
|                   | forest_edge_300 /                 |             |             |             |
| watermelon        | Socia.fac_social                  | -0.01       | 0.02        | 0.99        |
| watermelon        | shannonH_300 / Socia.fac_social   | 0.06        | 0.86        | 0.47        |
| watermelon        | ag_1500 / Socia.fac_social        | -0.01       | -0.15       | 0.86        |
| watermelon        | open_1500 / Socia.fac_social      | 0.07        | 0.73        | 0.47        |
|                   | forest_edge_1500 /                |             |             |             |
| watermelon        | Socia.fac_social                  | 0           | -0.02       | 0.99        |
|                   | shannonH_1500 /                   |             |             |             |
| watermelon        | Socia.fac_social                  | 0.09        | 1.52        | 0.13        |
| watermelon        | ag_300 / Socia.Solitary           | 0.03        | 0.31        | 0.79        |
| watermelon        | open_300 / Socia.Solitary         | -0.01       | -0.15       | 0.89        |
| watermelon        | forest_edge_300 / Socia.Solitary  | -0.03       | -0.16       | 0.86        |

|                   |                                      |             |             |             |
|-------------------|--------------------------------------|-------------|-------------|-------------|
| watermelon        | shannonH_300 / Socia.Solitary        | -0.14       | -1.46       | 0.14        |
| watermelon        | ag_1500 / Socia.Solitary             | 0.05        | 0.54        | 0.61        |
| watermelon        | open_1500 / Socia.Solitary           | 0.13        | 1.33        | 0.2         |
| watermelon        | forest_edge_1500 /<br>Socia.Solitary | 0.07        | 0.74        | 0.48        |
| watermelon        | shannonH_1500 / Socia.Solitary       | -0.08       | -0.83       | 0.44        |
| watermelon        | ag_300 / Paras.No                    | -0.1        | -0.85       | 0.48        |
| watermelon        | open_300 / Paras.No                  | -0.02       | -0.24       | 0.88        |
| watermelon        | forest_edge_300 / Paras.No           | -0.02       | -0.22       | 0.82        |
| watermelon        | shannonH_300 / Paras.No              | 0.18        | 1.67        | 0.08        |
| watermelon        | ag_1500 / Paras.No                   | 0           | 0           | 1           |
| watermelon        | open_1500 / Paras.No                 | -0.22       | -2.07       | 0.05        |
| watermelon        | forest_edge_1500 / Paras.No          | -0.12       | -1.13       | 0.23        |
| watermelon        | shannonH_1500 / Paras.No             | 0.06        | 0.57        | 0.59        |
| watermelon        | ag_300 / Paras.Yes                   | 0.1         | 0.85        | 0.48        |
| watermelon        | open_300 / Paras.Yes                 | 0.02        | 0.24        | 0.88        |
| watermelon        | forest_edge_300 / Paras.Yes          | 0.02        | 0.22        | 0.82        |
| watermelon        | shannonH_300 / Paras.Yes             | -0.18       | -1.67       | 0.08        |
| watermelon        | ag_1500 / Paras.Yes                  | 0           | 0           | 1           |
| watermelon        | open_1500 / Paras.Yes                | 0.22        | 2.07        | 0.05        |
| watermelon        | forest_edge_1500 / Paras.Yes         | 0.12        | 1.13        | 0.23        |
| watermelon        | shannonH_1500 / Paras.Yes            | -0.06       | -0.57       | 0.59        |
| <b>watermelon</b> | <b>ag_300 / ITfam</b>                | <b>0.23</b> | <b>2.19</b> | <b>0.02</b> |
| watermelon        | open_300 / ITfam                     | -0.07       | -0.61       | 0.56        |
| watermelon        | forest_edge_300 / ITfam              | -0.1        | -0.82       | 0.41        |
| watermelon        | shannonH_300 / ITfam                 | -0.15       | -1.39       | 0.18        |
| watermelon        | ag_1500 / ITfam                      | -0.13       | -1.15       | 0.27        |
| watermelon        | open_1500 / ITfam                    | -0.1        | -0.94       | 0.36        |
| watermelon        | forest_edge_1500 / ITfam             | -0.03       | -0.29       | 0.79        |
| watermelon        | shannonH_1500 / ITfam                | -0.09       | -0.78       | 0.45        |
| watermelon        | ag_300 / PDrar20                     | -0.08       | -0.76       | 0.52        |
| watermelon        | open_300 / PDrar20                   | -0.04       | -0.53       | 0.63        |
| watermelon        | forest_edge_300 / PDrar20            | 0.02        | 0.18        | 0.88        |
| watermelon        | shannonH_300 / PDrar20               | 0.08        | 1           | 0.35        |
| watermelon        | ag_1500 / PDrar20                    | 0.05        | 0.51        | 0.7         |
| watermelon        | open_1500 / PDrar20                  | -0.13       | -1.56       | 0.12        |
| watermelon        | forest_edge_1500 / PDrar20           | -0.06       | -0.7        | 0.52        |
| watermelon        | shannonH_1500 / PDrar20              | 0.02        | 0.22        | 0.86        |
| <b>watermelon</b> | <b>ag_300 / tongue</b>               | <b>0.23</b> | <b>2.18</b> | <b>0.02</b> |
| watermelon        | open_300 / tongue                    | -0.07       | -0.64       | 0.55        |
| watermelon        | forest_edge_300 / tongue             | -0.09       | -0.76       | 0.45        |
| watermelon        | shannonH_300 / tongue                | -0.14       | -1.38       | 0.19        |
| watermelon        | ag_1500 / tongue                     | -0.12       | -1.11       | 0.29        |
| watermelon        | open_1500 / tongue                   | -0.1        | -0.92       | 0.37        |
| watermelon        | forest_edge_1500 / tongue            | -0.03       | -0.26       | 0.82        |

|            |                                  |       |       |      |
|------------|----------------------------------|-------|-------|------|
| watermelon | shannonH_1500 / tongue           | -0.08 | -0.73 | 0.48 |
| cranberry  | ag_300 / Nest_.cavity            | 0.1   | 1.09  | 0.3  |
| cranberry  | open_300 / Nest_.cavity          | -0.15 | -1.62 | 0.11 |
| cranberry  | forest_edge_300 / Nest_.cavity   | 0     | 0.05  | 0.97 |
| cranberry  | shannonH_300 / Nest_.cavity      | -0.07 | -0.71 | 0.51 |
| cranberry  | ag_1500 / Nest_.cavity           | 0.05  | 0.48  | 0.65 |
| cranberry  | open_1500 / Nest_.cavity         | -0.08 | -0.69 | 0.5  |
| cranberry  | forest_edge_1500 / Nest_.cavity  | -0.07 | -0.75 | 0.47 |
| cranberry  | shannonH_1500 / Nest_.cavity     | 0.04  | 0.38  | 0.72 |
| cranberry  | ag_300 / Nest_.hole              | 0.01  | 0.12  | 0.91 |
| cranberry  | open_300 / Nest_.hole            | -0.05 | -0.56 | 0.58 |
| cranberry  | forest_edge_300 / Nest_.hole     | 0.01  | 0.18  | 0.88 |
| cranberry  | shannonH_300 / Nest_.hole        | -0.03 | -0.56 | 0.58 |
| cranberry  | ag_1500 / Nest_.hole             | -0.04 | -0.43 | 0.68 |
| cranberry  | open_1500 / Nest_.hole           | -0.08 | -0.64 | 0.56 |
| cranberry  | forest_edge_1500 / Nest_.hole    | -0.02 | -0.22 | 0.87 |
| cranberry  | shannonH_1500 / Nest_.hole       | -0.05 | -0.51 | 0.61 |
| cranberry  | ag_300 / Nest_.soil              | -0.09 | -0.89 | 0.41 |
| cranberry  | open_300 / Nest_.soil            | 0.09  | 0.97  | 0.36 |
| cranberry  | forest_edge_300 / Nest_.soil     | 0     | 0.01  | 1    |
| cranberry  | shannonH_300 / Nest_.soil        | 0.09  | 0.81  | 0.45 |
| cranberry  | ag_1500 / Nest_.soil             | -0.04 | -0.33 | 0.76 |
| cranberry  | open_1500 / Nest_.soil           | 0.13  | 1.08  | 0.3  |
| cranberry  | forest_edge_1500 / Nest_.soil    | 0.09  | 0.87  | 0.41 |
| cranberry  | shannonH_1500 / Nest_.soil       | -0.02 | -0.17 | 0.91 |
| cranberry  | ag_300 / Nest_.stem              | -0.03 | -0.52 | 0.36 |
| cranberry  | open_300 / Nest_.stem            | 0.02  | 0.21  | 0.84 |
| cranberry  | forest_edge_300 / Nest_.stem     | 0     | 0.07  | 0.94 |
| cranberry  | shannonH_300 / Nest_.stem        | 0.02  | 0.32  | 0.56 |
| cranberry  | ag_1500 / Nest_.stem             | -0.01 | -0.11 | 0.9  |
| cranberry  | open_1500 / Nest_.stem           | 0.03  | 0.51  | 0.44 |
| cranberry  | forest_edge_1500 / Nest_.stem    | 0.02  | 0.36  | 0.61 |
| cranberry  | shannonH_1500 / Nest_.stem       | 0     | 0.05  | 0.92 |
| cranberry  | ag_300 / Nest_.wood              | -0.05 | -0.55 | 0.6  |
| cranberry  | open_300 / Nest_.wood            | 0.17  | 1.77  | 0.07 |
| cranberry  | forest_edge_300 / Nest_.wood     | -0.02 | -0.3  | 0.76 |
| cranberry  | shannonH_300 / Nest_.wood        | 0.01  | 0.1   | 0.93 |
| cranberry  | ag_1500 / Nest_.wood             | 0     | 0.05  | 0.96 |
| cranberry  | open_1500 / Nest_.wood           | 0     | -0.04 | 0.97 |
| cranberry  | forest_edge_1500 / Nest_.wood    | 0     | 0     | 1    |
| cranberry  | shannonH_1500 / Nest_.wood       | -0.01 | -0.07 | 0.94 |
| cranberry  | ag_300 / Socia.Eusocial          | 0.02  | 0.28  | 0.82 |
| cranberry  | open_300 / Socia.Eusocial        | 0.03  | 0.19  | 0.88 |
| cranberry  | forest_edge_300 / Socia.Eusocial | 0.01  | 0.09  | 0.93 |

|           |                                     |       |       |      |
|-----------|-------------------------------------|-------|-------|------|
| cranberry | shannonH_300 / Socia.Eusocial       | 0.02  | 0.28  | 0.8  |
| cranberry | ag_1500 / Socia.Eusocial            | -0.01 | -0.08 | 0.95 |
| cranberry | open_1500 / Socia.Eusocial          | 0.02  | 0.18  | 0.88 |
| cranberry | forest_edge_1500 / Socia.Eusocial   | -0.01 | -0.14 | 0.92 |
| cranberry | shannonH_1500 / Socia.Eusocial      | 0.01  | 0.12  | 0.91 |
| cranberry | ag_300 / Socia.fac_social           | 0.03  | 0.75  | 0.47 |
| cranberry | open_300 / Socia.fac_social         | 0.04  | 0.29  | 0.77 |
| cranberry | forest_edge_300 / Socia.fac_social  | -0.05 | -1.15 | 0.29 |
| cranberry | shannonH_300 / Socia.fac_social     | -0.04 | -0.71 | 0.32 |
| cranberry | ag_1500 / Socia.fac_social          | 0.04  | 0.71  | 0.47 |
| cranberry | open_1500 / Socia.fac_social        | 0.01  | 0.23  | 0.77 |
| cranberry | forest_edge_1500 / Socia.fac_social | 0.01  | 0.22  | 0.81 |
| cranberry | shannonH_1500 / Socia.fac_social    | 0.03  | 0.56  | 0.5  |
| cranberry | ag_300 / Socia.Solitary             | -0.03 | -0.41 | 0.74 |
| cranberry | open_300 / Socia.Solitary           | -0.04 | -0.37 | 0.72 |
| cranberry | forest_edge_300 / Socia.Solitary    | 0.01  | 0.15  | 0.9  |
| cranberry | shannonH_300 / Socia.Solitary       | -0.01 | -0.09 | 0.94 |
| cranberry | ag_1500 / Socia.Solitary            | 0     | -0.03 | 0.97 |
| cranberry | open_1500 / Socia.Solitary          | -0.03 | -0.23 | 0.86 |
| cranberry | forest_edge_1500 / Socia.Solitary   | 0.01  | 0.07  | 0.96 |
| cranberry | shannonH_1500 / Socia.Solitary      | -0.02 | -0.32 | 0.79 |
| cranberry | ag_300 / Paras.No                   | 0     | -0.01 | 1    |
| cranberry | open_300 / Paras.No                 | 0.01  | 0.16  | 0.87 |
| cranberry | forest_edge_300 / Paras.No          | 0     | -0.05 | 0.96 |
| cranberry | shannonH_300 / Paras.No             | 0     | 0.01  | 0.97 |
| cranberry | ag_1500 / Paras.No                  | 0     | 0.04  | 0.97 |
| cranberry | open_1500 / Paras.No                | 0.01  | -0.05 | 0.96 |
| cranberry | forest_edge_1500 / Paras.No         | 0.02  | 0.14  | 0.88 |
| cranberry | shannonH_1500 / Paras.No            | 0.03  | 0.24  | 0.74 |
| cranberry | ag_300 / Paras.Yes                  | 0     | 0.01  | 1    |
| cranberry | open_300 / Paras.Yes                | -0.01 | -0.16 | 0.87 |
| cranberry | forest_edge_300 / Paras.Yes         | 0     | 0.05  | 0.96 |
| cranberry | shannonH_300 / Paras.Yes            | 0     | -0.01 | 0.97 |
| cranberry | ag_1500 / Paras.Yes                 | 0     | -0.04 | 0.97 |
| cranberry | open_1500 / Paras.Yes               | -0.01 | 0.05  | 0.96 |
| cranberry | forest_edge_1500 / Paras.Yes        | -0.02 | -0.14 | 0.88 |
| cranberry | shannonH_1500 / Paras.Yes           | -0.03 | -0.24 | 0.74 |
| cranberry | ag_300 / ITfam                      | 0.13  | 1.37  | 0.19 |
| cranberry | open_300 / ITfam                    | -0.13 | -1.36 | 0.18 |
| cranberry | forest_edge_300 / ITfam             | -0.05 | -0.54 | 0.62 |

|           |                                 |       |       |      |
|-----------|---------------------------------|-------|-------|------|
| cranberry | shannonH_300 / ITfam            | -0.12 | -1.31 | 0.2  |
| cranberry | ag_1500 / ITfam                 | 0.14  | 1.45  | 0.15 |
| cranberry | open_1500 / ITfam               | 0.01  | 0.02  | 0.99 |
| cranberry | forest_edge_1500 / ITfam        | 0     | -0.08 | 0.93 |
| cranberry | shannonH_1500 / ITfam           | 0.11  | 1.18  | 0.27 |
| cranberry | ag_300 / PDrar20                | -0.05 | -0.47 | 0.68 |
| cranberry | open_300 / PDrar20              | 0.18  | 1.87  | 0.08 |
| cranberry | forest_edge_300 / PDrar20       | 0.02  | 0.16  | 0.88 |
| cranberry | shannonH_300 / PDrar20          | 0.09  | 0.87  | 0.42 |
| cranberry | ag_1500 / PDrar20               | -0.06 | -0.66 | 0.55 |
| cranberry | open_1500 / PDrar20             | 0.06  | 0.46  | 0.71 |
| cranberry | forest_edge_1500 / PDrar20      | 0.03  | 0.27  | 0.82 |
| cranberry | shannonH_1500 / PDrar20         | -0.01 | -0.08 | 0.95 |
| cranberry | ag_300 / tongue                 | 0.11  | 1.19  | 0.25 |
| cranberry | open_300 / tongue               | -0.15 | -1.54 | 0.13 |
| cranberry | forest_edge_300 / tongue        | -0.01 | -0.13 | 0.91 |
| cranberry | shannonH_300 / tongue           | -0.09 | -0.9  | 0.39 |
| cranberry | ag_1500 / tongue                | 0.07  | 0.72  | 0.5  |
| cranberry | open_1500 / tongue              | -0.06 | -0.5  | 0.66 |
| cranberry | forest_edge_1500 / tongue       | -0.06 | -0.64 | 0.58 |
| cranberry | shannonH_1500 / tongue          | 0.06  | 0.6   | 0.6  |
| blueberry | ag_300 / Nest_.cavity           | -0.14 | -0.76 | 0.52 |
| blueberry | open_300 / Nest_.cavity         | 0.11  | 0.68  | 0.52 |
| blueberry | forest_edge_300 / Nest_.cavity  | 0.1   | 0.61  | 0.64 |
| blueberry | shannonH_300 / Nest_.cavity     | 0.09  | 0.53  | 0.69 |
| blueberry | ag_1500 / Nest_.cavity          | -0.34 | -1.13 | 0.21 |
| blueberry | open_1500 / Nest_.cavity        | 0.2   | 1.33  | 0.19 |
| blueberry | forest_edge_1500 / Nest_.cavity | 0.24  | 0.94  | 0.31 |
| blueberry | shannonH_1500 / Nest_.cavity    | -0.04 | -0.25 | 0.82 |
| blueberry | ag_300 / Nest_.hole             | -0.03 | -0.02 | 0.93 |
| blueberry | open_300 / Nest_.hole           | -0.02 | -0.35 | 0.82 |
| blueberry | forest_edge_300 / Nest_.hole    | 0.05  | 0.23  | 0.81 |
| blueberry | shannonH_300 / Nest_.hole       | 0.07  | 0.4   | 0.72 |
| blueberry | ag_1500 / Nest_.hole            | 0.08  | 0.52  | 0.44 |
| blueberry | open_1500 / Nest_.hole          | -0.05 | -0.55 | 0.6  |
| blueberry | forest_edge_1500 / Nest_.hole   | 0.01  | 0     | 1    |
| blueberry | shannonH_1500 / Nest_.hole      | 0.05  | 0.29  | 0.71 |
| blueberry | ag_300 / Nest_.soil             | 0.12  | 0.75  | 0.5  |
| blueberry | open_300 / Nest_.soil           | -0.12 | -0.78 | 0.51 |
| blueberry | forest_edge_300 / Nest_.soil    | -0.05 | -0.3  | 0.77 |
| blueberry | shannonH_300 / Nest_.soil       | -0.08 | -0.47 | 0.67 |
| blueberry | ag_1500 / Nest_.soil            | 0.41  | 1.28  | 0.14 |
| blueberry | open_1500 / Nest_.soil          | -0.09 | -0.55 | 0.65 |
| blueberry | forest_edge_1500 / Nest_.soil   | -0.4  | -1.48 | 0.08 |

|           |                                        |       |       |      |
|-----------|----------------------------------------|-------|-------|------|
| blueberry | shannonH_1500 / Nest_.soil             | -0.08 | -0.48 | 0.72 |
| blueberry | ag_300 / Nest_.wood                    | 0.01  | 0.07  | 0.95 |
| blueberry | open_300 / Nest_.wood                  | 0.03  | 0.09  | 0.92 |
| blueberry | forest_edge_300 / Nest_.wood           | -0.07 | -0.54 | 0.74 |
| blueberry | shannonH_300 / Nest_.wood              | -0.02 | -0.19 | 0.92 |
| blueberry | ag_1500 / Nest_.wood                   | -0.15 | -0.48 | 0.52 |
| blueberry | open_1500 / Nest_.wood                 | -0.12 | -0.93 | 0.4  |
| blueberry | forest_edge_1500 / Nest_.wood          | 0.25  | 1.07  | 0.18 |
| blueberry | shannonH_1500 / Nest_.wood             | 0.15  | 0.85  | 0.33 |
| blueberry | ag_300 / Socia.Eusocial                | -0.17 | -1.03 | 0.36 |
| blueberry | open_300 / Socia.Eusocial              | 0.13  | 0.83  | 0.47 |
| blueberry | forest_edge_300 / Socia.Eusocial       | 0.16  | 1.1   | 0.29 |
| blueberry | shannonH_300 / Socia.Eusocial          | 0.13  | 0.84  | 0.42 |
| blueberry | ag_1500 / Socia.Eusocial               | -0.32 | -1.04 | 0.38 |
| blueberry | open_1500 / Socia.Eusocial             | 0.21  | 1.38  | 0.17 |
| blueberry | forest_edge_1500 /<br>Socia.Eusocial   | 0.2   | 0.77  | 0.67 |
| blueberry | shannonH_1500 / Socia.Eusocial         | -0.01 | -0.02 | 0.98 |
| blueberry | ag_300 / Socia.fac_social              | 0.08  | 0.7   | 0.5  |
| blueberry | open_300 / Socia.fac_social            | -0.06 | -0.48 | 0.66 |
| blueberry | forest_edge_300 /<br>Socia.fac_social  | -0.12 | -1.09 | 0.29 |
| blueberry | shannonH_300 / Socia.fac_social        | -0.09 | -0.76 | 0.46 |
| blueberry | ag_1500 / Socia.fac_social             | -0.12 | -0.59 | 0.31 |
| blueberry | open_1500 / Socia.fac_social           | -0.18 | -1.52 | 0.12 |
| blueberry | forest_edge_1500 /<br>Socia.fac_social | 0.22  | 1.36  | 0.09 |
| blueberry | shannonH_1500 /<br>Socia.fac_social    | 0.13  | 1.19  | 0.26 |
| blueberry | ag_300 / Socia.Solitary                | 0.11  | 0.67  | 0.55 |
| blueberry | open_300 / Socia.Solitary              | -0.08 | -0.55 | 0.63 |
| blueberry | forest_edge_300 / Socia.Solitary       | -0.07 | -0.44 | 0.67 |
| blueberry | shannonH_300 / Socia.Solitary          | -0.06 | -0.38 | 0.74 |
| blueberry | ag_1500 / Socia.Solitary               | 0.39  | 1.27  | 0.13 |
| blueberry | open_1500 / Socia.Solitary             | -0.08 | -0.52 | 0.66 |
| blueberry | forest_edge_1500 /<br>Socia.Solitary   | -0.34 | -1.3  | 0.17 |
| blueberry | shannonH_1500 / Socia.Solitary         | -0.08 | -0.51 | 0.73 |
| blueberry | ag_300 / Paras.No                      | 0     | -0.71 | 1    |
| blueberry | open_300 / Paras.No                    | 0     | 0.65  | 1    |
| blueberry | forest_edge_300 / Paras.No             | 0     | -0.69 | 0.91 |
| blueberry | shannonH_300 / Paras.No                | 0     | 0.43  | 0.88 |
| blueberry | ag_1500 / Paras.No                     | 0     | 0.69  | 0.99 |
| blueberry | open_1500 / Paras.No                   | 0     | -0.7  | 0.97 |
| blueberry | forest_edge_1500 / Paras.No            | 0     | 0.96  | 0.34 |

|           |                            |       |       |      |
|-----------|----------------------------|-------|-------|------|
| blueberry | shannonH_1500 / Paras.No   | 0     | -0.72 | 0.88 |
| blueberry | ag_300 / ITfam             | -0.03 | -0.13 | 0.9  |
| blueberry | open_300 / ITfam           | 0.01  | 0.02  | 0.99 |
| blueberry | forest_edge_300 / ITfam    | -0.05 | -0.33 | 0.78 |
| blueberry | shannonH_300 / ITfam       | -0.02 | -0.16 | 0.88 |
| blueberry | ag_1500 / ITfam            | -0.42 | -1.33 | 0.16 |
| blueberry | open_1500 / ITfam          | -0.02 | -0.09 | 0.95 |
| blueberry | forest_edge_1500 / ITfam   | 0.42  | 1.59  | 0.08 |
| blueberry | shannonH_1500 / ITfam      | 0.12  | 0.73  | 0.52 |
| blueberry | ag_300 / PDrar20           | -0.08 | -0.4  | 0.73 |
| blueberry | open_300 / PDrar20         | 0.13  | 0.66  | 0.53 |
| blueberry | forest_edge_300 / PDrar20  | 0     | -0.02 | 0.98 |
| blueberry | shannonH_300 / PDrar20     | 0.03  | 0.15  | 0.89 |
| blueberry | ag_1500 / PDrar20          | -0.42 | -1.39 | 0.17 |
| blueberry | open_1500 / PDrar20        | -0.04 | -0.19 | 0.87 |
| blueberry | forest_edge_1500 / PDrar20 | 0.35  | 1.37  | 0.17 |
| blueberry | shannonH_1500 / PDrar20    | 0.32  | 1.59  | 0.11 |
| blueberry | ag_300 / tongue            | -0.17 | -0.91 | 0.41 |
| blueberry | open_300 / tongue          | 0.05  | 0.29  | 0.82 |
| blueberry | forest_edge_300 / tongue   | 0.08  | 0.41  | 0.72 |
| blueberry | shannonH_300 / tongue      | 0.08  | 0.41  | 0.71 |
| blueberry | ag_1500 / tongue           | -0.48 | -1.51 | 0.12 |
| blueberry | open_1500 / tongue         | 0.07  | 0.35  | 0.73 |
| blueberry | forest_edge_1500 / tongue  | 0.36  | 1.39  | 0.18 |
| blueberry | shannonH_1500 / tongue     | -0.02 | -0.08 | 0.95 |

683

684 Table S4: Model selection procedure showing all models within 2 AICc values.

| Crop       | Measure              | Model                | Delta AICc |
|------------|----------------------|----------------------|------------|
| Watermelon | Visitation Frequency | ~ body size + tongue | 0          |
| Watermelon | Visitation Frequency | ~ tongue             | 0.06       |
| Watermelon | Visitation Frequency | ~ .                  | 0.28       |
| Watermelon | Visitation Frequency | ~ body size          | 1.99       |
| Watermelon | Pollen deposition    | ~ body size + tongue | 0          |
| Cranberry  | Visitation Frequency | ~ sociality + tongue | 0          |
| Cranberry  | Visitation Frequency | ~ nest place         | 1.43       |
| Cranberry  | Visitation Frequency | ~ sociality          | 1.56       |
| Cranberry  | Pollen deposition    | ~ .                  | 0          |
| Blueberry  | Visitation Frequency | ~ specialization     | 0          |
| Blueberry  | Pollen deposition    | ~ tongue             | 0          |

685
